# Supplementary material for: Designing bifunctional alkene isomerization catalysts using predictive modelling
Source: Royal Society of Chemistry journal article supplement (doi:10.1039/c7cy01106g), 2017-01-01
Supplement: c7cy01106g1.xlsx [file c7cy01106g1.xlsx]

## Sheet: Data set
	Catalyst	Reaction conditions				Performance				Selected descriptors
#	Cat.#	Substrate	Catalyst loading (mol%)	T (°C)	Time in min	Yield 2-E-alkene (%)	Yield 3-alkene (%)	logTON(t50)	logTOF(t50,min)	Mass R2 (g/mol)	d_Ru-P	d_Ru-N	d_Ru-Cp	E(HOMO)	PSA	q(e)_N*
1	1	1-hex	0.7	25	120	38.4	12.3	4.2687	0.157824	86.17	2.254	2.037	1.802	-12.21	11.315	0.688
2	2	1-hex	1	40	1320	50.1	1.1	3.91202	-2.62727	86.17	2.254	2.037	1.802	-12.21	11.315	0.688
3	2	1-hex	0.1	40	2880	38.3	0	6.21461	-3.22061	86.17	2.2805	2.7945	1.816	-11.715	15.042	0.6345
4	2	1-hex	0.5	25	15	48.3	0.7	4.60517	-2.89646	86.17	2.2805	2.7945	1.816	-11.715	15.042	0.6345
5	2	1-hex	0.25	25	30	48.5	0	5.29832	-2.56913	86.17	2.2805	2.7945	1.816	-11.715	15.042	0.6345
6	3	1-hex	0.1	25	15	48.4	0	6.21461	3.35241	86.17	2.287	2.043	1.805	-12.23	5.601	0.682
7	3	1-hex	0.1	40	15	52.5	0	6.21461	3.51998	86.17	2.287	2.043	1.805	-12.23	5.601	0.682
8	3	1-hex	0.5	25	15	49.9	0.9	4.60517	2.56395	86.17	2.287	2.043	1.805	-12.23	5.601	0.682
9	3	1-hex	0.25	25	13.8	49.1	0.6	5.29832	3.17009	86.17	2.287	2.043	1.805	-12.23	5.601	0.682
10	12	1-hex	0.1	25	120	47.2	0	6.21461	1.09841	86.17	2.2736	2.051	1.8152	-12.218	11.4318	0.6958
11	7	1-hex	2	25	4.2	50.2	2.6	3.21888	2.43042	86.17	2.254	2.038	1.803	-12.18	11.39	0.613
12	4	1-hex	2	25	4.8	48.7	3.3	3.21888	2.30259	166.3	2.258	2.038	1.801	-12.13	11.317	0.68
13	8	1-hex	2	70	58.2	41.2	8.3	3.21888	-0.237441	114.22	2.291	2.054	1.804	-12.16	11.314	0.682
14	5	1-hex	2	70	60	40.9	3.2	3.21888	-1.60141	114.22	2.293	2.051	1.805	-12.19	11.249	0.631
15	11	1-hex	2	25	840	28.9	10.9	3.21888	-2.83978	30.07	2.245	3.559	1.806	-11.7	22.27	0.543
16	9	1-hex	2	25	34.8	43.9	0	3.21888	-4.31396	114.22	2.293	2.021	1.801	-11.47	10.623	0.357
17	10	1-hex	2	25	10.8	34.3	10.6	3.21888	1.51413	154.2	2.235	2.049	1.8	-12.01	11.473	0.765
18	13	1-hex	2	25	13.2	38.5	3	3.21888	-4.61219	330.51	2.237	2.042	1.805	-11.6	25.53	0.358
19	8	1-hex	8	25	1681.8	31.8	4	1.83258	-5.58115	114.22	2.291	2.054	1.804	-12.16	11.314	0.682
20	4	1-hex	2	0	19.8	48.9	1	3.21888	0.733969	166.3	2.258	2.038	1.801	-12.13	11.317	0.68
21	7	1-hex	2	0	19.8	49	1	3.21888	0.750776	86.17	2.254	2.038	1.803	-12.18	11.39	0.613
22	1	1-hex	2	0	3	48.4	0.9	3.21888	2.57702	86.17	2.254	2.037	1.802	-12.21	11.315	0.688
23	1	1-hex	2	-20	3	46.6	1.1	3.21888	0.136966	86.17	2.254	2.037	1.802	-12.21	11.315	0.688
24	1	1-hept	1	25	10.2	30.3	19.4	3.91202	2.26336	86.17	2.254	2.037	1.802	-12.21	11.315	0.688
25	1	1-hept	2	25	15	34.3	14.5	3.21888	1.19073	86.17	2.254	2.037	1.802	-12.21	11.315	0.688
26	4	1-hept	2	25	30	30.4	18.5	3.21888	0.49758	166.3	2.258	2.038	1.801	-12.13	11.317	0.68
27	5	1-hept	2	70	60	46	2.9	3.21888	-1.93094	114.22	2.293	2.051	1.805	-12.19	11.249	0.631
28	6	1-hept	2	70	19.8	41.8	2.8	3.21888	0.350977	270.44	2.29	2.04	1.805	-12.11	10.74	0.794
29	7	1-hept	2	25	9	40.1	9	3.21888	1.69282	86.17	2.254	2.038	1.803	-12.18	11.39	0.613
30	8	1-hept	2	70	19.8	40.4	5.6	3.21888	0.802962	114.22	2.291	2.054	1.804	-12.16	11.314	0.682
31	2	1-hept	1	40	1320	49.6	0.9	3.91202	-2.64205	86.17	2.2805	2.7945	1.816	-11.715	15.042	0.6345
32	3	1-hept	0.5	25	15	49	0	4.60517	1.91732	86.17	2.287	2.043	1.805	-12.23	5.601	0.682
33	9	1-hept	2	25	34.8	40.9	0	3.21888	-4.57459	114.22	2.293	2.021	1.801	-11.47	10.623	0.357
34	10	1-hept	2	25	10.8	30	10.9	3.21888	1.51413	154.2	2.235	2.049	1.8	-12.01	11.473	0.765
35	8	1-hept	8	25	1689	40.5	0.6	1.83258	-7.1963	114.22	2.291	2.054	1.804	-12.16	11.314	0.682
36	9	1-hept	2	70	40.2	45.3	0.5	3.21888	-4.08598	114.22	2.293	2.021	1.801	-11.47	10.623	0.357
37	4	1-hept	2	0	19.8	48.3	0.7	3.21888	0.701179	166.3	2.258	2.038	1.801	-12.13	11.317	0.68
38	1	1-hept	2	0	3	48.2	0.7	3.21888	2.52573	86.17	2.254	2.037	1.802	-12.21	11.315	0.688
39	7	1-hept	2	0	19.8	49.2	0.7	3.21888	0.72567	86.17	2.254	2.038	1.803	-12.18	11.39	0.613

## Sheet: Descriptors
		Data points (39) -->			1	2	3	4	5	6	7	8	9	10	11	12	13	14	15	16	17	18	19	20	21	22	23	24	25	26	27	28	29	30	31	32	33	34	35	36	37	38	39
	Descriptors V		Source	Type
1	bN	basicity' of the basic nitrogen of the phosphine ligand, T dependent	MarvinSketch	Electrostatic	6.62	6.34	6.34	6.62	6.62	6.62	6.34	6.62	6.62	6.62	6.65	6.61	5.85	5.82	6.72	5.73	6.45	5.31	6.6	7.13	7.18	7.14	7.63	6.62	6.62	6.61	5.82	5.85	6.65	5.85	6.34	6.62	5.73	6.45	6.6	5.1	7.13	7.14	7.18
2	nCR1	Number of C atoms in R1	Count	Constitutional	6	6	6	6	6	6	6	6	6	6	6	12	8	8	2	8	12	20	8	12	6	6	6	6	6	12	8	20	6	8	6	6	8	12	8	8	12	6	6
3	nHR1	Number of H atoms in R1	Count	Constitutional	14	14	14	14	14	14	14	14	14	14	14	22	18	18	6	18	10	34	18	22	14	14	14	14	14	22	18	30	14	18	14	14	18	10	18	18	22	14	14
4	mR2	Molecular weight of R1 (g/mol)	calculate	Constitutional	86.17	86.17	86.17	86.17	86.17	86.17	86.17	86.17	86.17	86.17	86.17	166.3	114.22	114.22	30.07	114.22	154.2	330.51	114.22	166.3	86.17	86.17	86.17	86.17	86.17	166.3	114.22	270.44	86.17	114.22	86.17	86.17	114.22	154.2	114.22	114.22	166.3	86.17	86.17
5	nCR2	Number of C atoms in R2	Count	Constitutional	4	4	4	4	4	4	4	4	4	4	10	4	10	4	4	4	4	4	10	4	10	4	4	4	4	4	4	4	10	10	4	4	4	4	10	4	4	4	10
6	nHR2	Number of H atoms in R2	Count	Constitutional	9	9	9	9	9	9	9	9	9	9	15	9	15	9	9	4	9	9	15	9	15	9	9	9	9	9	9	9	15	15	9	9	4	9	15	4	9	9	15
7	g/mol	Molecular weight of R2	calculate	Constitutional	57.11	57.11	57.11	57.11	57.11	57.11	57.11	57.11	57.11	57.11	135.22	57.11	135.22	57.11	57.11	52.07	57.11	57.11	135.22	57.11	135.22	57.11	57.11	57.11	57.11	57.11	57.11	57.11	135.22	135.22	57.11	57.11	52.07	57.11	135.22	52.07	57.11	57.11	135.22
8	d_Ru-P	Distance Ru-P (Å)	Spartan	Topological	2.254	2.254	2.2805	2.2805	2.2805	2.287	2.287	2.287	2.287	2.2736	2.254	2.258	2.291	2.293	2.245	2.293	2.235	2.237	2.291	2.258	2.254	2.254	2.254	2.254	2.254	2.258	2.293	2.29	2.254	2.291	2.2805	2.287	2.293	2.235	2.291	2.293	2.258	2.254	2.254
9	d_Ru-N	Distance Ru-N (Å)	Spartan	Topological	2.037	2.037	2.7945	2.7945	2.7945	2.043	2.043	2.043	2.043	2.051	2.038	2.038	2.054	2.051	3.559	2.021	2.049	2.042	2.054	2.038	2.038	2.037	2.037	2.037	2.037	2.038	2.051	2.04	2.038	2.054	2.7945	2.043	2.021	2.049	2.054	2.021	2.038	2.037	2.038
10	sum_dRu-P+Ru-N	Sum distance Ru-P and Ru-N (Å)	Spartan	Topological	4.291	4.291	5.075	5.075	5.075	4.33	4.33	4.33	4.33	4.3246	4.292	4.296	4.345	4.344	5.804	4.314	4.284	4.279	4.345	4.296	4.292	4.291	4.291	4.291	4.291	4.296	4.344	4.33	4.292	4.345	5.075	4.33	4.314	4.284	4.345	4.314	4.296	4.291	4.292
11	d_P-C(imid)	Distance P-C(imidazole) (Å)	Spartan	Topological	1.949	1.949	1.916	1.916	1.916	1.915	1.915	1.915	1.915	1.9314	1.947	1.949	1.932	1.936	1.859	1.974	1.954	1.925	1.932	1.949	1.947	1.949	1.949	1.949	1.949	1.949	1.936	1.946	1.947	1.932	1.916	1.915	1.974	1.954	1.932	1.974	1.949	1.949	1.947
12	d_Ru-N(nitrile)	Distance Ru-N(nitrile) (Å)	Spartan	Topolgical	1.933	1.933	1.9305	1.9305	1.9305	0	0	0	0	1.9376	1.933	1.934	1.933	1.933	1.929	1.935	1.932	1.931	1.933	1.934	1.933	1.933	1.933	1.933	1.933	1.934	1.933	1.936	1.933	1.933	1.9305	0	1.935	1.932	1.933	1.935	1.934	1.933	1.933
13	d_Ru-Cp	Distance Ru-Cp(centroid) (Å)	Spartan	Topological	1.802	1.802	1.816	1.816	1.816	1.805	1.805	1.805	1.805	1.8152	1.803	1.801	1.804	1.805	1.806	1.801	1.8	1.805	1.804	1.801	1.803	1.802	1.802	1.802	1.802	1.801	1.805	1.805	1.803	1.804	1.816	1.805	1.801	1.8	1.804	1.801	1.801	1.802	1.803
14	A_PRuN	Angle P-Ru-N (°)	Spartan	Topological	71.64	71.64	60.955	60.955	60.955	69.57	69.57	69.57	69.57	70.902	71.7	71.64	71	70.81	50.42	70.28	71.83	71.2	71	71.64	71.7	71.64	71.64	71.64	71.64	71.64	70.81	71.48	71.7	71	60.955	69.57	70.28	71.83	71	70.28	71.64	71.64	71.7
15	A_CPRu	Angle C(imidazole)-P-Ru (°)	Spartan	Topological	83.82	83.82	99.435	99.435	99.435	84.73	84.73	84.73	84.73	83.916	83.73	83.67	83.39	83.5	115.93	83.44	84.28	84.86	83.39	83.67	83.73	83.82	83.82	83.82	83.82	83.67	83.5	82.78	83.73	83.39	99.435	84.73	83.44	84.28	83.39	83.44	83.67	83.82	83.73
16	A_RuNC	Angle Ru-N-C(imidazole) (°)	Spartan	Topological	108.51	108.51	93.47	93.47	93.47	109.76	109.76	109.76	109.76	108.064	108.22	108.37	107.97	108.5	75.85	112.13	108.08	108.14	107.97	108.37	108.22	108.51	108.51	108.51	108.51	108.37	108.5	108.24	108.22	107.97	93.47	109.76	112.13	108.08	107.97	112.13	108.37	108.51	108.22
17	A_PCN	Angle P-C(imidazole)-N (°)	Spartan	Topological	95.95	95.95	105.185	105.185	105.185	95.35	95.35	95.35	95.35	96.544	96.14	96.18	97.44	96.97	116.24	94.13	95.81	95.74	97.44	96.18	96.14	95.95	95.95	95.95	95.95	96.18	96.97	97.27	96.14	97.44	105.185	95.35	94.13	95.81	97.44	94.13	96.18	95.95	96.14
18	Weight	Weight (amu)	Spartan	Constitutional	461.576	461.576	552.237	552.237	552.237	490.658	490.658	490.658	490.658	585.681	539.69	541.706	567.744	489.63	446.521	483.582	529.61	751.962	567.744	541.706	539.69	461.576	461.576	461.576	461.576	541.706	489.63	645.858	539.69	567.744	552.237	490.658	483.582	529.61	567.744	483.582	541.706	461.576	539.69
19	E(HOMO)	E(HOMO) (eV)	Spartan	Electrostatic	-12.21	-12.21	-11.715	-11.715	-11.715	-12.23	-12.23	-12.23	-12.23	-12.218	-12.18	-12.13	-12.16	-12.19	-11.7	-11.47	-12.01	-11.6	-12.16	-12.13	-12.18	-12.21	-12.21	-12.21	-12.21	-12.13	-12.19	-12.11	-12.18	-12.16	-11.715	-12.23	-11.47	-12.01	-12.16	-11.47	-12.13	-12.21	-12.18
20	E(LUMO)	E(LUMO) (eV)	Spartan	Electrostatic	-3.02	-3.02	-2.835	-2.835	-2.835	-3.3	-3.3	-3.3	-3.3	-3.136	-2.99	-2.95	-3.17	-3.2	-2.68	-3.3	-2.96	-3.03	-3.17	-2.95	-2.99	-3.02	-3.02	-3.02	-3.02	-2.95	-3.2	-2.99	-2.99	-3.17	-2.835	-3.3	-3.3	-2.96	-3.17	-3.3	-2.95	-3.02	-2.99
21	E(GAP)	E(GAP) (eV)	Spartan	Electrostatic	9.19	9.19	8.88	8.88	8.88	8.93	8.93	8.93	8.93	9.082	9.19	9.18	8.99	8.99	9.02	8.17	9.05	8.57	8.99	9.18	9.19	9.19	9.19	9.19	9.19	9.18	8.99	9.12	9.19	8.99	8.88	8.93	8.17	9.05	8.99	8.17	9.18	9.19	9.19
22	DM	Dipole moment (debye)	Spartan	Electrostatic	2.52	2.52	5.085	5.085	5.085	4.01	4.01	4.01	4.01	6.024	6.45	2.3	5.58	3.11	8.65	2.39	3.03	7.66	5.58	2.3	6.45	2.52	2.52	2.52	2.52	2.3	3.11	4.37	6.45	5.58	5.085	4.01	2.39	3.03	5.58	2.39	2.3	2.52	6.45
23	A	Area (Å^2)	Spartan	Geometrical	465.04	465.04	566.905	566.905	566.905	498.19	498.19	498.19	498.19	557.234	520.49	535.85	537.92	482.12	463.67	460.95	511.71	775.88	537.92	535.85	520.49	465.04	465.04	465.04	465.04	535.85	482.12	603.5	520.49	537.92	566.905	498.19	460.95	511.71	537.92	460.95	535.85	465.04	520.49
24	V	Volume (Å^3)	Spartan	Geometrical	441.11	441.11	554.43	554.43	554.43	480.14	480.14	480.14	480.14	543.622	512.18	524.57	545.84	474.49	419.13	454.67	498.36	749.67	545.84	524.57	512.18	441.11	441.11	441.11	441.11	524.57	474.49	619.43	512.18	545.84	554.43	480.14	454.67	498.36	545.84	454.67	524.57	441.11	512.18
25	PSA	PSA (Å^3)	Spartan	Geometrical	11.315	11.315	15.042	15.042	15.042	5.601	5.601	5.601	5.601	11.4318	11.39	11.317	11.314	11.249	22.27	10.623	11.473	25.53	11.314	11.317	11.39	11.315	11.315	11.315	11.315	11.317	11.249	10.74	11.39	11.314	15.042	5.601	10.623	11.473	11.314	10.623	11.317	11.315	11.39
26	Ovality	Ovality	Spartan	Geometrical	1.66	1.66	1.735	1.735	1.735	1.68	1.68	1.68	1.68	1.73	1.68	1.7	1.67	1.64	1.71	1.61	1.68	1.94	1.67	1.7	1.68	1.66	1.66	1.66	1.66	1.7	1.64	1.72	1.68	1.67	1.735	1.68	1.61	1.68	1.67	1.61	1.7	1.66	1.68
27	Polarizability	Polarizability	Spartan	Electrostatic	74.99	74.99	84.255	84.255	84.255	78.22	78.22	78.22	78.22	83.332	80.76	81.76	83.54	77.75	73.25	76.33	79.67	100.17	83.54	81.76	80.76	74.99	74.99	74.99	74.99	81.76	77.75	89.47	80.76	83.54	84.255	78.22	76.33	79.67	83.54	76.33	81.76	74.99	80.76
28	q(e)_Ru	Charge, electrostatic, Ru	Spartan	Electrostatic	-0.437	-0.437	-0.4525	-0.4525	-0.4525	0.113	0.113	0.113	0.113	-0.4442	-0.381	-0.357	-0.466	-0.426	-0.535	-0.394	-0.48	-0.505	-0.466	-0.357	-0.381	-0.437	-0.437	-0.437	-0.437	-0.357	-0.426	-0.465	-0.381	-0.466	-0.4525	0.113	-0.394	-0.48	-0.466	-0.394	-0.357	-0.437	-0.381
29	q(m)_Ru	Charge, Mulliken, Ru	Spartan	Electrostatic	-1.033	-1.033	-1.0285	-1.0285	-1.0285	-0.677	-0.677	-0.677	-0.677	-0.9556	-1.031	-1.03	-0.999	-0.998	-1.157	-1.02	-1.056	-1.062	-0.999	-1.03	-1.031	-1.033	-1.033	-1.033	-1.033	-1.03	-0.998	-0.997	-1.031	-0.999	-1.0285	-0.677	-1.02	-1.056	-0.999	-1.02	-1.03	-1.033	-1.031
30	q(e)_P	Charge, electrostatic, P	Spartan	Electrostatic	0.615	0.615	0.526	0.526	0.526	0.249	0.249	0.249	0.249	0.667	0.601	0.377	0.347	0.33	1.05	0.298	0.844	0.807	0.347	0.377	0.601	0.615	0.615	0.615	0.615	0.377	0.33	0.477	0.601	0.347	0.526	0.249	0.298	0.844	0.347	0.298	0.377	0.615	0.601
31	q(m)_P	Charge, Mulliken, P	Spartan	Electrostatic	1.363	1.363	1.3295	1.3295	1.3295	1.272	1.272	1.272	1.272	1.3264	1.361	1.357	1.272	1.273	1.487	1.278	1.597	1.739	1.272	1.357	1.361	1.363	1.363	1.363	1.363	1.357	1.273	1.295	1.361	1.272	1.3295	1.272	1.278	1.597	1.272	1.278	1.357	1.363	1.361
32	q(e)_C(imid)	Charge, electrostatic, C(imidazole)	Spartan	Electrostatic	-0.507	-0.507	-0.221	-0.221	-0.221	-0.257	-0.257	-0.257	-0.257	-0.5332	-0.432	-0.483	-0.4	-0.394	-0.025	-0.385	-0.607	-0.337	-0.4	-0.483	-0.432	-0.507	-0.507	-0.507	-0.507	-0.483	-0.394	-0.589	-0.432	-0.4	-0.221	-0.257	-0.385	-0.607	-0.4	-0.385	-0.483	-0.507	-0.432
33	q(m)_C(imid)	Charge, Mulliken, C(imidazole)	Spartan	Electrostatic	-0.756	-0.756	-0.654	-0.654	-0.654	-0.72	-0.72	-0.72	-0.72	-0.7476	-0.756	-0.752	-0.738	-0.738	-0.608	-0.656	-0.762	-0.696	-0.738	-0.752	-0.756	-0.756	-0.756	-0.756	-0.756	-0.752	-0.738	-0.747	-0.756	-0.738	-0.654	-0.72	-0.656	-0.762	-0.738	-0.656	-0.752	-0.756	-0.756
34	q(e)_N	Charge, electrostatic, N	Spartan	Electrostatic	0.144	0.144	-0.225	-0.225	-0.225	-0.15	-0.15	-0.15	-0.15	0.1298	0.12	0.164	0.142	0.161	-0.668	0.127	0.19	0.223	0.142	0.164	0.12	0.144	0.144	0.144	0.144	0.164	0.161	0.219	0.12	0.142	-0.225	-0.15	0.127	0.19	0.142	0.127	0.164	0.144	0.12
35	q(m)_N	Charge, Mulliken, N	Spartan	Electrostatic	0.464	0.464	0.155	0.155	0.155	0.395	0.395	0.395	0.395	0.4424	0.461	0.462	0.441	0.446	-0.13	0.439	0.439	0.422	0.441	0.462	0.461	0.464	0.464	0.464	0.464	0.462	0.446	0.462	0.461	0.441	0.155	0.395	0.439	0.439	0.441	0.439	0.462	0.464	0.461
36	q(e)_C	Charge, electrostatic, C	Spartan	Electrostatic	-0.026	-0.026	0.013	0.013	0.013	0.082	0.082	0.082	0.082	-0.0404	-0.171	-0.079	-0.177	-0.145	0.38	0.017	-0.031	-0.415	-0.177	-0.079	-0.171	-0.026	-0.026	-0.026	-0.026	-0.079	-0.145	-0.149	-0.171	-0.177	0.013	0.082	0.017	-0.031	-0.177	0.017	-0.079	-0.026	-0.171
37	q(m)_C	Charge, Mulliken, C	Spartan	Electrostatic	-0.222	-0.222	-0.1635	-0.1635	-0.1635	-0.18	-0.18	-0.18	-0.18	-0.2116	-0.215	-0.221	-0.208	-0.216	-0.107	-0.208	-0.215	-0.209	-0.208	-0.221	-0.215	-0.222	-0.222	-0.222	-0.222	-0.221	-0.216	-0.224	-0.215	-0.208	-0.1635	-0.18	-0.208	-0.215	-0.208	-0.208	-0.221	-0.222	-0.215
38	q(e)_C2	Charge, electrostatic, C2	Spartan	Electrostatic	-0.473	-0.473	-0.499	-0.499	-0.499	-0.525	-0.525	-0.525	-0.525	-0.4676	-0.386	-0.449	-0.498	-0.457	-0.615	-0.017	-0.531	-0.356	-0.498	-0.449	-0.386	-0.473	-0.473	-0.473	-0.473	-0.449	-0.457	-0.477	-0.386	-0.498	-0.499	-0.525	-0.017	-0.531	-0.498	-0.017	-0.449	-0.473	-0.386
39	q(m)_C2	Charge, Mulliken, C2	Spartan	Electrostatic	-0.304	-0.304	-0.3065	-0.3065	-0.3065	-0.307	-0.307	-0.307	-0.307	-0.3072	-0.309	-0.305	-0.308	-0.303	-0.29	-0.186	-0.308	-0.313	-0.308	-0.305	-0.309	-0.304	-0.304	-0.304	-0.304	-0.305	-0.303	-0.301	-0.309	-0.308	-0.3065	-0.307	-0.186	-0.308	-0.308	-0.186	-0.305	-0.304	-0.309
40	q(e)_N2	Charge, electrostatic, N2	Spartan	Electrostatic	0.688	0.688	0.6345	0.6345	0.6345	0.682	0.682	0.682	0.682	0.6958	0.613	0.68	0.682	0.631	0.543	0.357	0.765	0.358	0.682	0.68	0.613	0.688	0.688	0.688	0.688	0.68	0.631	0.794	0.613	0.682	0.6345	0.682	0.357	0.765	0.682	0.357	0.68	0.688	0.613
41	q(m)_N2	Charge, Mulliken, N2	Spartan	Electrostatic	0.473	0.473	0.4225	0.4225	0.4225	0.482	0.482	0.482	0.482	0.4804	0.474	0.472	0.467	0.468	0.368	0.388	0.468	0.493	0.467	0.472	0.474	0.473	0.473	0.473	0.473	0.472	0.468	0.467	0.474	0.467	0.4225	0.482	0.388	0.468	0.467	0.388	0.472	0.473	0.474
42	nsb	Number of single bonds	ChemDes	Constitutional	12	12	12	12	12	12	12	12	12	12	21	20	23	14	8	10	8	24	23	20	21	12	12	12	12	20	14	32	21	23	12	12	10	8	23	10	20	12	21
43	ncarb	Count of C atoms	ChemDes	Constitutional	14	14	14	14	14	14	14	14	14	14	20	20	22	16	10	16	20	30	22	20	20	14	14	14	14	20	16	28	20	22	14	14	16	20	22	16	20	14	20
44	naro	Number of aromatic bonds	ChemDes	Constitutional	5	5	5	5	5	5	5	5	5	5	5	5	5	5	5	10	17	15	5	5	5	5	5	5	5	5	5	5	5	5	5	5	10	17	5	10	5	5	5
45	nhev	Count of heavy atoms	ChemDes	Constitutional	17	17	17	17	17	17	17	17	17	17	23	23	25	19	13	19	23	37	25	23	23	17	17	17	17	23	19	31	23	25	17	17	19	23	25	19	23	17	23
46	nta	Number of all atoms	ChemDes	Constitutional	44	44	44	44	44	44	44	44	44	44	56	58	62	50	32	44	46	88	62	58	56	44	44	44	44	58	50	74	56	62	44	44	44	46	62	44	58	44	56
47	nring	Number of rigns	ChemDes	Constitutional	1	1	1	1	1	1	1	1	1	1	4	3	4	1	1	2	3	3	4	3	4	1	1	1	1	3	1	9	4	4	1	1	2	3	4	2	3	1	4
48	nrot	Number of rotatable bonds	ChemDes	Constitutional	4	4	4	4	4	4	4	4	4	4	4	4	4	4	2	3	4	9	4	4	4	4	4	4	4	4	4	4	4	4	4	4	3	4	4	3	4	4	4
49	Weight	Molecular weight (not including H)	ChemDes	Constitutional	227142	227142	227142	227142	227142	227142	227142	227142	227142	227142	299208	299208	323.23	251164	179098	251164	299208	475346	323.23	299208	299208	227142	227142	227142	227142	299208	251164	395296	299208	323.23	227142	227142	251164	299208	323.23	251164	299208	227142	299208
50	PC2	Molecular path counts of length 1-6	ChemDes	Constitutional	26	26	26	26	26	26	26	26	26	26	40	36	46	32	20	32	36	63	46	36	40	26	26	26	26	36	32	60	40	46	26	26	32	36	46	32	36	26	40
51	PC3	Molecular path counts of length 1-6	ChemDes	Constitutional	30	30	30	30	30	30	30	30	30	30	56	46	60	34	22	39	46	78	60	46	56	30	30	30	30	46	34	86	56	60	30	30	39	46	60	39	46	30	56
52	PC1	Molecular path counts of length 1-6	ChemDes	Constitutional	17	17	17	17	17	17	17	17	17	17	26	25	28	19	13	20	25	39	28	25	26	17	17	17	17	25	19	37	26	28	17	17	20	25	28	20	25	17	26
53	PC6	Molecular path counts of length 1-6	ChemDes	Constitutional	40	40	40	40	40	40	40	40	40	40	131	86	137	46	28	65	86	207	137	86	131	40	40	40	40	86	46	264	131	137	40	40	65	86	137	65	86	40	131
54	PC4	Molecular path counts of length 1-6	ChemDes	Constitutional	37	37	37	37	37	37	37	37	37	37	81	61	90	46	25	56	61	105	90	61	81	37	37	37	37	61	46	133	81	90	37	37	56	61	90	56	61	37	81
55	PC5	Molecular path counts of length 1-6	ChemDes	Constitutional	39	39	39	39	39	39	39	39	39	39	103	79	109	45	27	58	79	147	109	79	103	39	39	39	39	79	45	199	103	109	39	39	58	79	109	58	79	39	103
56	AWeight	Average molecular weight (not including H)	ChemDes	Constitutional	13361	13361	13361	13361	13361	13361	13361	13361	13361	13361	13009	13009	12929	13219	13777	13219	13009	12847	12929	13009	13009	13361	13361	13361	13361	13009	13219	12751	13009	12929	13361	13361	13219	13009	12929	13219	13009	13361	13009
57	nhyd	Count of hydrogen atoms	ChemDes	Constitutional	27	27	27	27	27	27	27	27	27	27	33	35	37	31	19	25	23	51	37	35	33	27	27	27	27	35	31	43	33	37	27	27	25	23	37	25	35	27	33
58	GMTIV	Gutman molecular topological index based on topological distance	ChemDes	Topology	3319	3319	3319	3319	3319	3319	3319	3319	3319	3319	3788	3759	3864	3426	3006	3558	3945	4341	3864	3759	3788	3319	3319	3319	3319	3759	3426	4143	3788	3864	3319	3319	3558	3945	3864	3558	3759	3319	3788
59	AW	Average Wiender index	ChemDes	Topology	3618	3618	3618	3618	3618	3618	3618	3618	3618	3618	4462	4372	4.61	3731	3026	3637	4372	5495	4.61	4372	4462	3618	3618	3618	3618	4372	3731	4856	4462	4.61	3618	3618	3637	4372	4.61	3637	4372	3618	4462
60	Geto	Geometric topological index by Narumi	ChemDes	Topology	1735	1735	1735	1735	1735	1735	1735	1735	1735	1735	2088	2031	2015	1687	1736	1854	2031	1842	2015	2031	2088	1735	1735	1735	1735	2031	1687	2246	2088	2015	1735	1735	1854	2031	2015	1854	2031	1735	2088
61	DZ	Pogliani index	ChemDes	Topology	34667	34667	34667	34667	34667	34667	34667	34667	34667	34667	46667	46667	50667	38667	26667	38667	46667	76667	50667	46667	46667	34667	34667	34667	34667	46667	38667	62667	46667	50667	34667	34667	38667	46667	50667	38667	46667	34667	46667
62	Gravto	Gravitational topological index based on topological distance	ChemDes	Topology	55808	55808	55808	55808	55808	55808	55808	55808	55808	55808	79501	77834	88017	64112	41906	65897	77834	132405	88017	77834	79501	55808	55808	55808	55808	77834	64112	114982	79501	88017	55808	55808	65897	77834	88017	65897	77834	55808	79501
63	DET	Total information index on distance equality	ChemDes	Topology	299097	299097	299097	299097	299097	299097	299097	299097	299097	299097	693209	661654	836738	383259	143587	382006	661654	1959821	836738	661654	693209	299097	299097	299097	299097	661654	383259	1312797	693209	836738	299097	299097	382006	661654	836738	382006	661654	299097	693209
64	Sitov	Logarithm of the simple topological index by Narumi	ChemDes	Topology	10086	10086	10086	10086	10086	10086	10086	10086	10086	10086	17658	17017	18234	10661	7889	13957	21647	28137	18234	17017	17658	10086	10086	10086	10086	17017	10661	25806	17658	18234	10086	10086	13957	21647	18234	13957	17017	10086	17658
65	IDE	Mean information index on distance equality	ChemDes	Topology	2812	2812	2812	2812	2812	2812	2812	2812	2812	2812	3247	3117	3265	2805	2568	2797	3117	3294	3265	3117	3247	2812	2812	2812	2812	3117	2805	3224	3247	3265	2812	2812	2797	3117	3265	2797	3117	2812	3247
66	TIAC	Total information index on atomic composition	ChemDes	Topology	56.53	56.53	56.53	56.53	56.53	56.53	56.53	56.53	56.53	56.53	70308	71799	76303	62613	44.07	58119	61603	116.42	76303	71799	70308	56.53	56.53	56.53	56.53	71799	62613	89564	70308	76303	56.53	56.53	58119	61603	76303	58119	71799	56.53	70308
67	Arto	Arithmetic topological index by Narumi	ChemDes	Topology	2	2	2	2	2	2	2	2	2	2	2261	2174	2.24	2	2	2105	2174	2108	2.24	2174	2261	2	2	2	2	2174	2	2387	2261	2.24	2	2	2105	2174	2.24	2105	2174	2	2261
68	Qindex	Quadratic index	ChemDes	Topology	12	12	12	12	12	12	12	12	12	12	23	18	27	16	10	17	18	31	27	18	23	12	12	12	12	18	16	38	23	27	12	12	17	18	27	17	18	12	23
69	petitjeant	Petitjean based on topology	ChemDes	Topology	0.429	0.429	0.429	0.429	0.429	0.429	0.429	0.429	0.429	0.429	0.5	0.444	0.5	0.429	0.5	0.429	0.444	0.5	0.5	0.444	0.5	0.429	0.429	0.429	0.429	0.444	0.429	0.5	0.5	0.5	0.429	0.429	0.429	0.444	0.5	0.429	0.444	0.429	0.5
70	Hatov	Harmonic topological index proposed by Narumi	ChemDes	Topology	1423	1423	1423	1423	1423	1423	1423	1423	1423	1423	1788	1776	1701	1378	1.4	1612	2069	1663	1701	1776	1788	1423	1423	1423	1423	1776	1378	1985	1788	1701	1423	1423	1612	2069	1701	1612	1776	1423	1788
71	diametert	Largest value in the distance matrix	ChemDes	Topology	7	7	7	7	7	7	7	7	7	7	10	9	10	7	6	7	9	10	10	9	10	7	7	7	7	9	7	10	10	10	7	7	7	9	10	7	9	7	10
72	BertzCT	BertzCT	ChemDes	Topology	2561	2561	2561	2561	2561	2561	2561	2561	2561	2561	2753	2685	2801	2628	2469	2756	2864	3028	2801	2685	2753	2561	2561	2561	2561	2685	2628	2884	2753	2801	2561	2561	2756	2864	2801	2756	2685	2561	2753
73	IVDE	Total information index on vertex equality	ChemDes	Topology	27977	27977	27977	27977	27977	27977	27977	27977	27977	27977	34727	37513	46264	32736	22596	35.84	37513	65776	46264	37513	34727	27977	27977	27977	27977	37513	32736	49258	34727	46264	27977	27977	35.84	37513	46264	35.84	37513	27977	34727
74	ISIZ	Total information index on molecular size	ChemDes	Topology	240215	240215	240215	240215	240215	240215	240215	240215	240215	240215	325212	339763	369.16	282193	160	240215	254084	568.43	369.16	339763	325212	240215	240215	240215	240215	339763	282193	459.5	325212	369.16	240215	240215	240215	254084	369.16	240215	339763	240215	325212
75	Platt	Platt number	ChemDes	Topology	52	52	52	52	52	52	52	52	52	52	80	72	92	64	40	64	72	126	92	72	80	52	52	52	52	72	64	120	80	92	52	52	64	72	92	64	72	52	80
76	ZM2	Zagreb index with order 1-2	ChemDes	Topology	99	99	99	99	99	99	99	99	99	99	162	143	180	117	75	123	143	243	180	143	162	99	99	99	99	143	117	243	162	180	99	99	123	143	180	123	143	99	162
77	Getov	Geometric topological index by Narumi	ChemDes	Topology	1.81	1.81	1.81	1.81	1.81	1.81	1.81	1.81	1.81	1.81	2155	2096	2074	1753	1835	2085	2563	2139	2074	2096	2155	1.81	1.81	1.81	1.81	2096	1753	2299	2155	2074	1.81	1.81	2085	2563	2074	2085	2096	1.81	2155
78	ZM1	Zagreb index with order 1-2	ChemDes	Topology	86	86	86	86	86	86	86	86	86	86	132	122	148	102	66	104	122	204	148	122	132	86	86	86	86	122	102	194	132	148	86	86	104	122	148	104	122	86	132
79	J	Balaban	ChemDes	Topology	2786	2786	2786	2786	2786	2786	2786	2786	2786	2786	1471	1762	1513	3002	2602	2235	1762	2.12	1513	1762	1471	2786	2786	2786	2786	1762	3002	1253	1471	1513	2786	2786	2235	1762	1513	2235	1762	2786	1471
80	radiust	Radius basd on topology	ChemDes	Topology	4	4	4	4	4	4	4	4	4	4	5	5	5	4	3	4	5	5	5	5	5	4	4	4	4	5	4	5	5	5	4	4	4	5	5	4	5	4	5
81	Tsch	Schiultz index	ChemDes	Topology	1900	1900	1900	1900	1900	1900	1900	1900	1900	1900	5044	4724	6110	2450	932	2565	4724	14670	6110	4724	5044	1900	1900	1900	1900	4724	2450	10644	5044	6110	1900	1900	2565	4724	6110	2565	4724	1900	5044
82	Thara	Harary number	ChemDes	Topology	52214	52214	52214	52214	52214	52214	52214	52214	52214	52214	85298	83589	97603	63188	34767	64464	83589	173282	97603	83589	85298	52214	52214	52214	52214	83589	63188	139517	85298	97603	52214	52214	64464	83589	97603	64464	83589	52214	85298
83	W	Weiner index	ChemDes	Topology	492	492	492	492	492	492	492	492	492	492	1129	1106	1383	638	236	622	1106	3660	1383	1106	1129	492	492	492	492	1106	638	2258	1129	1383	492	492	622	1106	1383	622	1106	492	1129
84	MZM2	Modified Zagreb index with order 1-2	ChemDes	Topology	0.91	0.91	0.91	0.91	0.91	0.91	0.91	0.91	0.91	0.91	1031	1077	0.951	0.83	0.664	0.848	1077	1694	0.951	1077	1031	0.91	0.91	0.91	0.91	1077	0.83	1071	1031	0.951	0.91	0.91	0.848	1077	0.951	0.848	1077	0.91	1031
85	GMTI	Gutman molecular topological index based on simple vertex degree	ChemDes	Topology	3217	3217	3217	3217	3217	3217	3217	3217	3217	3217	3723	3678	3803	3328	2892	3381	3678	4152	3803	3678	3723	3217	3217	3217	3217	3678	3328	4.08	3723	3803	3217	3217	3381	3678	3803	3381	3678	3217	3723
86	MZM1	Modified Zagreb index with order 1-2	ChemDes	Topology	9229	9229	9229	9229	9229	9229	9229	9229	9229	9229	7972	7729	9875	11132	7007	8931	7729	18132	9875	7729	7972	9229	9229	9229	9229	7729	11132	8618	7972	9875	9229	9229	8931	7729	9875	8931	7729	9229	7972
87	Ipc	Ipc index	ChemDes	Topology	3567	3567	3567	3567	3567	3567	3567	3567	3567	3567	5352	5316	5562	3773	2794	4091	5316	7717	5562	5316	5352	3567	3567	3567	3567	5316	3773	7333	5352	5562	3567	3567	4091	5316	5562	4091	5316	3567	5352
88	Sito	the logarithm of the simple topological index by Narumi	ChemDes	Topology	9364	9364	9364	9364	9364	9364	9364	9364	9364	9364	16937	16296	17512	9.94	7167	11731	16296	22.6	17512	16296	16937	9364	9364	9364	9364	16296	9.94	25085	16937	17512	9364	9364	11731	16296	17512	11731	16296	9364	16937
89	Tigdi	Graph distance index	ChemDes	Topology	3464	3464	3464	3464	3464	3464	3464	3464	3464	3464	3879	3.91	4018	3662	3062	3666	3.91	4689	4018	3.91	3879	3464	3464	3464	3464	3.91	3662	4403	3879	4018	3464	3464	3666	3.91	4018	3666	3.91	3464	3879
90	Pol	Polarity number	ChemDes	Topology	25	25	25	25	25	25	25	25	25	25	40	35	44	29	17	31	35	63	44	35	40	25	25	25	25	35	29	57	40	44	25	25	31	35	44	31	35	25	40
91	Hato	harmonic topological index proposed by Narumi	ChemDes	Topology	1511	1511	1511	1511	1511	1511	1511	1511	1511	1511	1.89	1878	1786	1452	1515	1629	1878	1603	1786	1878	1.89	1511	1511	1511	1511	1878	1452	2078	1.89	1786	1511	1511	1629	1878	1786	1629	1878	1511	1.89
92	Xu	Xu index	ChemDes	Topology	16537	16537	16537	16537	16537	16537	16537	16537	16537	16537	21954	21877	23485	18119	12762	18112	21877	31976	23485	21877	21954	16537	16537	16537	16537	21877	18119	27749	21954	23485	16537	16537	18112	21877	23485	18112	21877	16537	21954
93	knotp	the difference between chi3c and chi4pc	ChemDes	Connectivity	1428	1428	1428	1428	1428	1428	1428	1428	1428	1428	2594	1718	1651	0.486	1059	0.882	1718	3535	1651	1718	2594	1428	1428	1428	1428	1718	0.486	3271	2594	1651	1428	1428	0.882	1718	1651	0.882	1718	1428	2594
94	dchi3	the difference between chi3v and chi3	ChemDes	Connectivity	0.864	0.864	0.864	0.864	0.864	0.864	0.864	0.864	0.864	0.864	1022	1.22	1356	1198	0.789	0.601	1758	3811	1356	1.22	1022	0.864	0.864	0.864	0.864	1.22	1198	1545	1022	1356	0.864	0.864	0.601	1758	1356	0.601	1.22	0.864	1022
95	dchi2	the difference between chi2v and chi2	ChemDes	Connectivity	1421	1421	1421	1421	1421	1421	1421	1421	1421	1421	1456	0.904	1868	1833	0.451	1214	1652	2658	1868	0.904	1456	1421	1421	1421	1421	0.904	1833	0.675	1456	1868	1421	1421	1214	1652	1868	1214	0.904	1421	1456
96	dchi1	the difference between chi1v and chi1	ChemDes	Connectivity	0.303	0.303	0.303	0.303	0.303	0.303	0.303	0.303	0.303	0.303	0.297	0.303	0.178	0.184	0.949	0.44	1717	1575	0.178	0.303	0.297	0.303	0.303	0.303	0.303	0.303	0.184	0.303	0.297	0.178	0.303	0.303	0.44	1717	0.178	0.44	0.303	0.303	0.297
97	dchi0	the difference between chi0v and chi0	ChemDes	Connectivity	0.09	0.09	0.09	0.09	0.09	0.09	0.09	0.09	0.09	0.09	0.09	0.09	0.09	0.09	0.09	0.377	1362	1259	0.09	0.09	0.09	0.09	0.09	0.09	0.09	0.09	0.09	0.09	0.09	0.09	0.09	0.09	0.377	1362	0.09	0.377	0.09	0.09	0.09
98	Chi5ch	Simple molecular connectivity	ChemDes	Connectivity	0.096	0.096	0.096	0.096	0.096	0.096	0.096	0.096	0.096	0.096	0.192	0.096	0.192	0.096	0.096	0.079	0.096	0.289	0.192	0.096	0.192	0.096	0.096	0.096	0.096	0.096	0.096	0.096	0.192	0.192	0.096	0.096	0.079	0.096	0.192	0.079	0.096	0.096	0.192
99	Chiv4	Atom valence connectivity index	ChemDes	Connectivity	4878	4878	4878	4878	4878	4878	4878	4878	4878	4878	8955	8139	10503	6425	2.23	6767	4841	6859	10503	8139	8955	4878	4878	4878	4878	8139	6425	14591	8955	10503	4878	4878	6767	4841	10503	6767	8139	4878	8955
100	Chiv7	Atom valence connectivity index	ChemDes	Connectivity	1037	1037	1037	1037	1037	1037	1037	1037	1037	1037	3.24	3958	3369	1247	0.398	1115	1707	3266	3369	3958	3.24	1037	1037	1037	1037	3958	1247	11172	3.24	3369	1037	1037	1115	1707	3369	1115	3958	1037	3.24
101	Chiv6	Atom valence connectivity index	ChemDes	Connectivity	1342	1342	1342	1342	1342	1342	1342	1342	1342	1342	4228	5226	4.37	1.46	1061	1655	2598	5.09	4.37	5226	4228	1342	1342	1342	1342	5226	1.46	12695	4228	4.37	1342	1342	1655	2598	4.37	1655	5226	1342	4228
102	Chiv1	Atom valence connectivity index	ChemDes	Connectivity	7944	7944	7944	7944	7944	7944	7944	7944	7944	7944	11232	11268	11715	8427	6769	8181	9249	15154	11715	11268	11232	7944	7944	7944	7944	11268	8427	15133	11232	11715	7944	7944	8181	9249	11715	8181	11268	7944	11232
103	Chiv0	Atom valence connectivity index	ChemDes	Connectivity	13468	13468	13468	13468	13468	13468	13468	13468	13468	13468	16.39	16539	18236	15313	10313	14045	15087	26989	18236	16539	16.39	13468	13468	13468	13468	16539	15313	21158	16.39	18236	13468	13468	14045	15087	18236	14045	16539	13468	16.39
104	Chiv3	Atom valence connectivity index	ChemDes	Connectivity	6067	6067	6067	6067	6067	6067	6067	6067	6067	6067	10003	9271	10597	6661	3236	6788	6294	8905	10597	9271	10003	6067	6067	6067	6067	9271	6661	14696	10003	10597	6067	6067	6788	6294	10597	6788	9271	6067	10003
105	Chiv2	Atom valence connectivity index	ChemDes	Connectivity	9662	9662	9662	9662	9662	9662	9662	9662	9662	9662	12383	11453	14939	12218	6.87	10891	8897	16238	14939	11453	12383	9662	9662	9662	9662	11453	12218	16444	12383	14939	9662	9662	10891	8897	14939	10891	11453	9662	12383
106	Chi4c	Carbon connectivity index	ChemDes	Connectivity	0.289	0.289	0.289	0.289	0.289	0.289	0.289	0.289	0.289	0.289	0	0.289	0.577	0.866	0.289	0.577	0.289	0.866	0.577	0.289	0	0.289	0.289	0.289	0.289	0.289	0.866	0.289	0	0.577	0.289	0.289	0.577	0.289	0.577	0.577	0.289	0.289	0
107	dchi4	the difference between chi4v and chi4	ChemDes	Connectivity	0.595	0.595	0.595	0.595	0.595	0.595	0.595	0.595	0.595	0.595	0.491	1492	1285	1389	0.687	0.641	1805	3151	1285	1492	0.491	0.595	0.595	0.595	0.595	1492	1389	2048	0.491	1285	0.595	0.595	0.641	1805	1285	0.641	1492	0.595	0.491
108	Chiv4pc	Simple molecular connectivity	ChemDes	Connectivity	4516	4516	4516	4516	4516	4516	4516	4516	4516	4516	5618	4515	8015	6913	2466	6.24	3232	6382	8015	4515	5618	4516	4516	4516	4516	4515	6913	7949	5618	8015	4516	4516	6.24	3232	8015	6.24	4515	4516	5618
109	Chiv3c	Carbon valence connectivity index	ChemDes	Connectivity	3351	3351	3351	3351	3351	3351	3351	3351	3351	3351	2933	2576	6352	6.77	2249	5568	2193	5512	6352	2576	2933	3351	3351	3351	3351	2576	6.77	3801	2933	6352	3351	3351	5568	2193	6352	5568	2576	3351	2933
110	Chiv8	Atom valence connectivity index	ChemDes	Connectivity	0.434	0.434	0.434	0.434	0.434	0.434	0.434	0.434	0.434	0.434	2414	2802	2549	0.564	0	0.633	1.05	2153	2549	2802	2414	0.434	0.434	0.434	0.434	2802	0.564	9583	2414	2549	0.434	0.434	0.633	1.05	2549	0.633	2802	0.434	2414
111	Chi3c	Carbon connectivity index	ChemDes	Connectivity	2.66	2.66	2.66	2.66	2.66	2.66	2.66	2.66	2.66	2.66	2156	2327	4194	4698	2215	3447	2327	6459	4194	2327	2156	2.66	2.66	2.66	2.66	2327	4698	3699	2156	4194	2.66	2.66	3447	2327	4194	3447	2327	2.66	2156
112	Chi8	Atom connectivity index	ChemDes	Connectivity	0.475	0.475	0.475	0.475	0.475	0.475	0.475	0.475	0.475	0.475	3038	1946	3185	0.616	0	1282	1946	3568	3185	1946	3038	0.475	0.475	0.475	0.475	1946	0.616	6.25	3038	3185	0.475	0.475	1282	1946	3185	1282	1946	0.475	3038
113	Chi9	Atom connectivity index	ChemDes	Connectivity	0	0	0	0	0	0	0	0	0	0	1974	1235	2046	0	0	0.567	1235	2724	2046	1235	1974	0	0	0	0	1235	0	4645	1974	2046	0	0	0.567	1235	2046	0.567	1235	0	1974
114	Chi2	Atom connectivity index	ChemDes	Connectivity	8241	8241	8241	8241	8241	8241	8241	8241	8241	8241	10927	10549	13071	10385	6.42	9677	10549	18896	13071	10549	10927	8241	8241	8241	8241	10549	10385	15769	10927	13071	8241	8241	9677	10549	13071	9677	10549	8241	10927
115	Chi3	Atom connectivity index	ChemDes	Connectivity	5203	5203	5203	5203	5203	5203	5203	5203	5203	5203	8981	8051	9241	5463	4025	6188	8051	12716	9241	8051	8981	5203	5203	5203	5203	8051	5463	13151	8981	9241	5203	5203	6188	8051	9241	6188	8051	5203	8981
116	Chi0	Atom connectivity index	ChemDes	Connectivity	13378	13378	13378	13378	13378	13378	13378	13378	13378	13378	16301	16449	18146	15224	10224	14422	16449	28248	18146	16449	16301	13378	13378	13378	13378	16449	15224	21068	16301	18146	13378	13378	14422	16449	18146	14422	16449	13378	16301
117	Chi1	Atom connectivity index	ChemDes	Connectivity	7642	7642	7642	7642	7642	7642	7642	7642	7642	7642	10936	10965	11537	8243	5.82	8621	10965	16729	11537	10965	10936	7642	7642	7642	7642	10965	8243	14831	10936	11537	7642	7642	8621	10965	11537	8621	10965	7642	10936
118	Chi6	Atom connectivity index	ChemDes	Connectivity	1752	1752	1752	1752	1752	1752	1752	1752	1752	1752	5038	3789	5173	1865	1491	2632	3789	8133	5173	3789	5038	1752	1752	1752	1752	3789	1865	9511	5038	5173	1752	1752	2632	3789	5173	2632	3789	1752	5038
119	Chi7	Atom connectivity index	ChemDes	Connectivity	1139	1139	1139	1139	1139	1139	1139	1139	1139	1139	3972	2691	4112	1352	0.494	1971	2691	5402	4112	2691	3972	1139	1139	1139	1139	2691	1352	7738	3972	4112	1139	1139	1971	2691	4112	1971	2691	1139	3972
120	Chi4	Atom connectivity index	ChemDes	Connectivity	4283	4283	4283	4283	4283	4283	4283	4283	4283	4283	8465	6646	9218	5036	2917	6126	6646	10.01	9218	6646	8465	4283	4283	4283	4283	6646	5036	12543	8465	9218	4283	4283	6126	6646	9218	6126	6646	4283	8465
121	Chi5	Atom connectivity index	ChemDes	Connectivity	2882	2882	2882	2882	2882	2882	2882	2882	2882	2882	6567	5709	6849	3165	2014	3935	5709	8581	6849	5709	6567	2882	2882	2882	2882	5709	3165	11509	6567	6849	2882	2882	3935	5709	6849	3935	5709	2882	6567
122	Chiv5	Atom valence connectivity index	ChemDes	Connectivity	2562	2562	2562	2562	2562	2562	2562	2562	2562	2562	6033	7277	6423	2954	1332	2978	3919	5873	6423	7277	6033	2562	2562	2562	2562	7277	2954	14343	6033	6423	2562	2562	2978	3919	6423	2978	7277	2562	6033
123	Chiv4c	Carbon valence connectivity index	ChemDes	Connectivity	0.25	0.25	0.25	0.25	0.25	0.25	0.25	0.25	0.25	0.25	0	0.25	1342	1592	0.25	1342	0.25	0.75	1342	0.25	0	0.25	0.25	0.25	0.25	0.25	1592	0.25	0	1342	0.25	0.25	1342	0.25	1342	1342	0.25	0.25	0
124	Chiv9	Atom valence connectivity index	ChemDes	Connectivity	0	0	0	0	0	0	0	0	0	0	1505	1729	1584	0	0	0.251	0.552	1.42	1584	1729	1505	0	0	0	0	1729	0	7.45	1505	1584	0	0	0.251	0.552	1584	0.251	1729	0	1505
125	Chi4pc	Simple molecular connectivity	ChemDes	Connectivity	4088	4088	4088	4088	4088	4088	4088	4088	4088	4088	4.75	4045	5845	5183	3274	4328	4045	9994	5845	4045	4.75	4088	4088	4088	4088	4045	5183	6.97	4.75	5845	4088	4088	4328	4045	5845	4328	4045	4088	4.75
126	knotpv	the difference between chiv3c and chiv4pc	ChemDes	Connectivity	1165	1165	1165	1165	1165	1165	1165	1165	1165	1165	2685	1939	1662	0.142	0.217	0.672	1.04	0.87	1662	1939	2685	1165	1165	1165	1165	1939	0.142	4148	2685	1662	1165	1165	0.672	1.04	1662	0.672	1939	1165	2685
127	Chiv5ch	Simple molecular connectivity	ChemDes	Connectivity	0.029	0.029	0.029	0.029	0.029	0.029	0.029	0.029	0.029	0.029	0.125	0.029	0.125	0.029	0.029	0.025	0.029	0.087	0.125	0.029	0.125	0.029	0.029	0.029	0.029	0.029	0.029	0.029	0.125	0.125	0.029	0.029	0.025	0.029	0.125	0.025	0.029	0.029	0.125
128	Chiv10	Atom valence connectivity index	ChemDes	Connectivity	0	0	0	0	0	0	0	0	0	0	1019	0.955	1101	0	0	0.124	0.265	0.823	1101	0.955	1019	0	0	0	0	0.955	0	5883	1019	1101	0	0	0.124	0.265	1101	0.124	0.955	0	1019
129	Chiv6ch	Simple molecular connectivity	ChemDes	Connectivity	0	0	0	0	0	0	0	0	0	0	0.124	0.204	0.124	0	0	0.028	0.064	0	0.124	0.204	0.124	0	0	0	0	0.204	0	0.494	0.124	0.124	0	0	0.028	0.064	0.124	0.028	0.204	0	0.124
130	Chi10	Atom connectivity index	ChemDes	Connectivity	0	0	0	0	0	0	0	0	0	0	1357	0.71	1431	0	0	0.298	0.71	1788	1431	0.71	1357	0	0	0	0	0.71	0	3412	1357	1431	0	0	0.298	0.71	1431	0.298	0.71	0	1357
131	mChi1	mean chi1 (Randic) connectivity index	ChemDes	Connectivity	0.45	0.45	0.45	0.45	0.45	0.45	0.45	0.45	0.45	0.45	0.421	0.439	0.412	0.434	0.448	0.431	0.439	0.429	0.412	0.439	0.421	0.45	0.45	0.45	0.45	0.439	0.434	0.401	0.421	0.412	0.45	0.45	0.431	0.439	0.412	0.431	0.439	0.45	0.421
132	Chi6ch	Simple molecular connectivity	ChemDes	Connectivity	0	0	0	0	0	0	0	0	0	0	0.124	0.204	0.124	0	0	0.083	0.204	0	0.124	0.204	0.124	0	0	0	0	0.204	0	0.494	0.124	0.124	0	0	0.083	0.204	0.124	0.083	0.204	0	0.124
133	kappa1	Kappa alpha index for 1 bonded fragment	ChemDes	Kappa	15059	15059	15059	15059	15059	15059	15059	15059	15059	15059	16467	17811	18367	17053	11077	15.39	17811	31527	18367	17811	16467	15059	15059	15059	15059	17811	17053	20.38	16467	18367	15059	15059	15.39	17811	18367	15.39	17811	15059	16467
134	kappa3	Kappa alpha index for 3 bonded fragment	ChemDes	Kappa	3484	3484	3484	3484	3484	3484	3484	3484	3484	3484	2806	4159	3227	3986	2479	3.03	4159	6.84	3227	4159	2806	3484	3484	3484	3484	4159	3986	3.18	2806	3227	3484	3484	3.03	4159	3227	3.03	4159	3484	2806
135	kappa2	Kappa alpha index for 2 bonded fragment	ChemDes	Kappa	5325	5325	5325	5325	5325	5325	5325	5325	5325	5325	6064	7486	6	5.08	3.63	5.08	7486	11111	6	7486	6064	5325	5325	5325	5325	7486	5.08	7008	6064	6	5325	5325	5.08	7486	6	5.08	7486	5325	6064
136	kappam1	Molecular shape Kappa index for 1 bonded fragment	ChemDes	Kappa	14.7	14.7	14.7	14.7	14.7	14.7	14.7	14.7	14.7	14.7	16127	17463	18024	16694	10719	14527	15956	29614	18024	17463	16127	14.7	14.7	14.7	14.7	17463	16694	20051	16127	18024	14.7	14.7	14527	15956	18024	14527	17463	14.7	16127
137	kappam3	Molecular shape Kappa index for 3 bonded fragment	ChemDes	Kappa	3312	3312	3312	3312	3312	3312	3312	3312	3312	3312	2696	4007	3112	3813	2.31	2693	3378	6051	3112	4007	2696	3312	3312	3312	3312	4007	3813	3087	2696	3112	3312	3312	2693	3378	3112	2693	4007	3312	2696
138	kappam2	Molecular shape Kappa index for 2 bonded fragment	ChemDes	Kappa	5099	5099	5099	5099	5099	5099	5099	5099	5099	5099	5867	7258	5817	4879	3416	4594	6294	9985	5817	7258	5867	5099	5099	5099	5099	7258	4879	6835	5867	5817	5099	5099	4594	6294	5817	4594	7258	5099	5867
139	Smax31	Maximum of E-State value of specified atom type	ChemDes	E-state	2242	2242	2242	2242	2242	2242	2242	2242	2242	2242	2375	2398	2386	2253	2159	2289	2201	2374	2386	2398	2375	2242	2242	2242	2242	2398	2253	2.53	2375	2386	2242	2242	2289	2201	2386	2289	2398	2242	2375
140	S32	Sum of E-State of atom type: aasN	ChemDes	E-state	2242	2242	2242	2242	2242	2242	2242	2242	2242	2242	2375	2398	2386	2253	2159	2289	2201	7121	2386	2398	2375	2242	2242	2242	2242	2398	2253	2.53	2375	2386	2242	2242	2289	2201	2386	2289	2398	2242	2375
141	Smax8	Maximum of E-State value of specified atom type	ChemDes	E-state	0	0	0	0	0	0	0	0	0	0	1549	1458	1542	0	0	0	0	0	1542	1458	1549	0	0	0	0	1458	0	1576	1549	1542	0	0	0	0	1542	0	1458	0	1549
142	Smax6	Maximum of E-State value of specified atom type	ChemDes	E-state	2317	2317	2317	2317	2317	2317	2317	2317	2317	2317	2376	2294	2402	2343	2.24	2337	2215	2246	2402	2294	2376	2317	2317	2317	2317	2294	2343	2354	2376	2402	2317	2317	2337	2215	2402	2337	2294	2317	2376
143	Smax28	Maximum of E-State value of specified atom type	ChemDes	E-state	4916	4916	4916	4916	4916	4916	4916	4916	4916	4916	5268	5224	5359	5006	4672	4937	5026	5385	5359	5224	5268	4916	4916	4916	4916	5224	5006	5539	5268	5359	4916	4916	4937	5026	5359	4937	5224	4916	5268
144	S45	Sum of E-State of atom type: sssP	ChemDes	E-state	-0.169	-0.169	-0.169	-0.169	-0.169	-0.169	-0.169	-0.169	-0.169	-0.169	-0.157	-0.087	-0.321	-0.333	-0.091	-0.354	-0.641	-1129	-0.321	-0.087	-0.157	-0.169	-0.169	-0.169	-0.169	-0.087	-0.333	-0.151	-0.157	-0.321	-0.169	-0.169	-0.354	-0.641	-0.321	-0.354	-0.087	-0.169	-0.157
145	Smax44	Maximum of E-State value of specified atom type	ChemDes	E-state	-0.169	-0.169	-0.169	-0.169	-0.169	-0.169	-0.169	-0.169	-0.169	-0.169	-0.157	-0.087	-0.321	-0.333	-0.091	-0.354	-0.641	-1129	-0.321	-0.087	-0.157	-0.169	-0.169	-0.169	-0.169	-0.087	-0.333	-0.151	-0.157	-0.321	-0.169	-0.169	-0.354	-0.641	-0.321	-0.354	-0.087	-0.169	-0.157
146	S9	Sum of E-State of atom type: ssCH2	ChemDes	E-state	0	0	0	0	0	0	0	0	0	0	7506	14551	7.46	0	0	0	0	0	7.46	14551	7506	0	0	0	0	14551	0	15.71	7506	7.46	0	0	0	0	7.46	0	14551	0	7506
147	S7	Sum of E-State of atom type: sCH3	ChemDes	E-state	18088	18088	18088	18088	18088	18088	18088	18088	18088	18088	11739	9131	16654	22894	13167	16.17	8754	33652	16654	9131	11739	18088	18088	18088	18088	9131	22894	9409	11739	16654	18088	18088	16.17	8754	16654	16.17	9131	18088	11739
148	S19	Sum of E-State of atom type: ssssC	ChemDes	E-state	0.144	0.144	0.144	0.144	0.144	0.144	0.144	0.144	0.144	0.144	0	0.163	0.572	0.649	0.168	0.505	0.06	-0.155	0.572	0.163	0	0.144	0.144	0.144	0.144	0.163	0.649	0.158	0	0.572	0.144	0.144	0.505	0.06	0.572	0.505	0.163	0.144	0
149	Smin44	Minimum of E-State value of specified atom type	ChemDes	E-state	-0.169	-0.169	-0.169	-0.169	-0.169	-0.169	-0.169	-0.169	-0.169	-0.169	-0.157	-0.087	-0.321	-0.333	-0.091	-0.354	-0.641	-1129	-0.321	-0.087	-0.157	-0.169	-0.169	-0.169	-0.169	-0.087	-0.333	-0.151	-0.157	-0.321	-0.169	-0.169	-0.354	-0.641	-0.321	-0.354	-0.087	-0.169	-0.157
150	S13	Sum of E-State of atom type: sssCH	ChemDes	E-state	1387	1387	1387	1387	1387	1387	1387	1387	1387	1387	6282	1881	4766	0	0	0	0	0.827	4766	1881	6282	1387	1387	1387	1387	1881	0	10.48	6282	4766	1387	1387	0	0	4766	0	1881	1387	6282
151	S12	Sum of E-State of atom type: aaCH	ChemDes	E-state	2204	2204	2204	2204	2204	2204	2204	2204	2204	2204	2395	2316	2402	2.21	2.15	8419	23617	6.78	2402	2316	2395	2204	2204	2204	2204	2316	2.21	2414	2395	2402	2204	2204	8419	23617	2402	8419	2316	2204	2395
152	S17	Sum of E-State of atom type: aasC	ChemDes	E-state	2513	2513	2513	2513	2513	2513	2513	2513	2513	2513	2831	2748	2796	2478	2432	1.26	4974	6575	2796	2748	2831	2513	2513	2513	2513	2748	2478	2903	2831	2796	2513	2513	1.26	4974	2796	1.26	2748	2513	2831
153	Smin16	Minimum of E-State value of specified atom type	ChemDes	E-state	1212	1212	1212	1212	1212	1212	1212	1212	1212	1212	1394	1286	1371	1.2	1196	1.26	1148	1079	1371	1286	1394	1212	1212	1212	1212	1286	1.2	1338	1394	1371	1212	1212	1.26	1148	1371	1.26	1286	1212	1394
154	Smin31	Minimum of E-State value of specified atom type	ChemDes	E-state	2242	2242	2242	2242	2242	2242	2242	2242	2242	2242	2375	2398	2386	2253	2159	2289	2201	2374	2386	2398	2375	2242	2242	2242	2242	2398	2253	2.53	2375	2386	2242	2242	2289	2201	2386	2289	2398	2242	2375
155	Smax12	Maximum of E-State value of specified atom type	ChemDes	E-state	0.693	0.693	0.693	0.693	0.693	0.693	0.693	0.693	0.693	0.693	1071	0.941	1.06	0	0	0	0	0.276	1.06	0.941	1071	0.693	0.693	0.693	0.693	0.941	0	1084	1071	1.06	0.693	0.693	0	0	1.06	0	0.941	0.693	1071
156	Smax11	Maximum of E-State value of specified atom type	ChemDes	E-state	2204	2204	2204	2204	2204	2204	2204	2204	2204	2204	2395	2316	2402	2.21	2.15	2157	2212	2.26	2402	2316	2395	2204	2204	2204	2204	2316	2.21	2414	2395	2402	2204	2204	2157	2212	2402	2157	2316	2204	2395
157	Smax16	Maximum of E-State value of specified atom type	ChemDes	E-state	1301	1301	1301	1301	1301	1301	1301	1301	1301	1301	1437	1462	1425	1278	1236	1.26	1336	1112	1425	1462	1437	1301	1301	1301	1301	1462	1278	1565	1437	1425	1301	1301	1.26	1336	1425	1.26	1462	1301	1437
158	Smax18	Maximum of E-State value of specified atom type	ChemDes	E-state	0.144	0.144	0.144	0.144	0.144	0.144	0.144	0.144	0.144	0.144	0	0.163	0.286	0.266	0.168	0.253	0.06	-0.052	0.286	0.163	0	0.144	0.144	0.144	0.144	0.163	0.266	0.158	0	0.286	0.144	0.144	0.253	0.06	0.286	0.253	0.163	0.144	0
159	Smin28	Minimum of E-State value of specified atom type	ChemDes	E-state	4916	4916	4916	4916	4916	4916	4916	4916	4916	4916	5268	5224	5359	5006	4672	4937	5026	5385	5359	5224	5268	4916	4916	4916	4916	5224	5006	5539	5268	5359	4916	4916	4937	5026	5359	4937	5224	4916	5268
160	Smin6	Minimum of E-State value of specified atom type	ChemDes	E-state	2137	2137	2137	2137	2137	2137	2137	2137	2137	2137	2234	2249	2241	2143	2083	2.15	2.11	2242	2241	2249	2234	2137	2137	2137	2137	2249	2143	2346	2234	2241	2137	2137	2.15	2.11	2241	2.15	2249	2137	2234
161	S29	Sum of E-State of atom type: aaN	ChemDes	E-state	4916	4916	4916	4916	4916	4916	4916	4916	4916	4916	5268	5224	5359	5006	4672	4937	5026	16154	5359	5224	5268	4916	4916	4916	4916	5224	5006	5539	5268	5359	4916	4916	4937	5026	5359	4937	5224	4916	5268
162	Smin11	Minimum of E-State value of specified atom type	ChemDes	E-state	2204	2204	2204	2204	2204	2204	2204	2204	2204	2204	2395	2316	2402	2.21	2.15	2065	2.07	2.26	2402	2316	2395	2204	2204	2204	2204	2316	2.21	2414	2395	2402	2204	2204	2065	2.07	2402	2065	2316	2204	2395
163	Smin12	Minimum of E-State value of specified atom type	ChemDes	E-state	0.693	0.693	0.693	0.693	0.693	0.693	0.693	0.693	0.693	0.693	0.72	0.941	0.739	0	0	0	0	0.276	0.739	0.941	0.72	0.693	0.693	0.693	0.693	0.941	0	0.999	0.72	0.739	0.693	0.693	0	0	0.739	0	0.941	0.693	0.72
164	Smin18	Minimum of E-State value of specified atom type	ChemDes	E-state	0.144	0.144	0.144	0.144	0.144	0.144	0.144	0.144	0.144	0.144	0	0.163	0.286	0.118	0.168	0.253	0.06	-0.052	0.286	0.163	0	0.144	0.144	0.144	0.144	0.163	0.118	0.158	0	0.286	0.144	0.144	0.253	0.06	0.286	0.253	0.163	0.144	0
165	MATSv8	Moran autocorrelation descriptors based on atomic van der Waals volume	ChemDes	Moran autocorrelation	0	0	0	0	0	0	0	0	0	0	0.056	0.038	0.049	0	0	0	0.038	0.142	0.049	0.038	0.056	0	0	0	0	0.038	0	0.028	0.056	0.049	0	0	0	0.038	0.049	0	0.038	0	0.056
166	MATSp4	Moran autocorrelation descriptors based on atomic polarizability	ChemDes	Moran autocorrelation	0.03	0.03	0.03	0.03	0.03	0.03	0.03	0.03	0.03	0.03	0.028	0.009	0.03	0.033	0.006	0.024	0.009	0.425	0.03	0.009	0.028	0.03	0.03	0.03	0.03	0.009	0.033	-0.003	0.028	0.03	0.03	0.03	0.024	0.009	0.03	0.024	0.009	0.03	0.028
167	MATSp8	Moran autocorrelation descriptors based on atomic polarizability	ChemDes	Moran autocorrelation	0	0	0	0	0	0	0	0	0	0	-0.009	0.003	-0.006	0	0	0	0.003	0.02	-0.006	0.003	-0.009	0	0	0	0	0.003	0	0.002	-0.009	-0.006	0	0	0	0.003	-0.006	0	0.003	0	-0.009
168	MATSv1	Moran autocorrelation descriptors based on atomic van der Waals volume	ChemDes	Moran autocorrelation	-0.067	-0.067	-0.067	-0.067	-0.067	-0.067	-0.067	-0.067	-0.067	-0.067	-0.039	-0.042	-0.036	-0.06	-0.089	-0.054	-0.042	-0.187	-0.036	-0.042	-0.039	-0.067	-0.067	-0.067	-0.067	-0.042	-0.06	-0.026	-0.039	-0.036	-0.067	-0.067	-0.054	-0.042	-0.036	-0.054	-0.042	-0.067	-0.039
169	MATSp6	Moran autocorrelation descriptors based on atomic polarizability	ChemDes	Moran autocorrelation	0.004	0.004	0.004	0.004	0.004	0.004	0.004	0.004	0.004	0.004	-0.014	0.013	-0.013	0.004	0.005	0.004	0.013	-0.064	-0.013	0.013	-0.014	0.004	0.004	0.004	0.004	0.013	0.004	0.012	-0.014	-0.013	0.004	0.004	0.004	0.013	-0.013	0.004	0.013	0.004	-0.014
170	MATSv3	Moran autocorrelation descriptors based on atomic van der Waals volume	ChemDes	Moran autocorrelation	-0.129	-0.129	-0.129	-0.129	-0.129	-0.129	-0.129	-0.129	-0.129	-0.129	-0.058	-0.048	-0.053	-0.109	-0.202	-0.099	-0.048	-0.192	-0.053	-0.048	-0.058	-0.129	-0.129	-0.129	-0.129	-0.048	-0.109	0.001	-0.058	-0.053	-0.129	-0.129	-0.099	-0.048	-0.053	-0.099	-0.048	-0.129	-0.058
171	MATSv2	Moran autocorrelation descriptors based on atomic van der Waals volume	ChemDes	Moran autocorrelation	-0.086	-0.086	-0.086	-0.086	-0.086	-0.086	-0.086	-0.086	-0.086	-0.086	-0.063	-0.074	-0.04	-0.047	-0.172	-0.067	-0.074	-0.279	-0.04	-0.074	-0.063	-0.086	-0.086	-0.086	-0.086	-0.074	-0.047	-0.05	-0.063	-0.04	-0.086	-0.086	-0.067	-0.074	-0.04	-0.067	-0.074	-0.086	-0.063
172	MATSv5	Moran autocorrelation descriptors based on atomic van der Waals volume	ChemDes	Moran autocorrelation	0.108	0.108	0.108	0.108	0.108	0.108	0.108	0.108	0.108	0.108	-0.058	-0.058	-0.046	0.089	0.211	0.076	-0.058	-0.24	-0.046	-0.058	-0.058	0.108	0.108	0.108	0.108	-0.058	0.089	-0.101	-0.058	-0.046	0.108	0.108	0.076	-0.058	-0.046	0.076	-0.058	0.108	-0.058
173	MATSv4	Moran autocorrelation descriptors based on atomic van der Waals volume	ChemDes	Moran autocorrelation	-0.2	-0.2	-0.2	-0.2	-0.2	-0.2	-0.2	-0.2	-0.2	-0.2	-0.188	-0.121	-0.201	-0.211	-0.041	-0.183	-0.121	0.796	-0.201	-0.121	-0.188	-0.2	-0.2	-0.2	-0.2	-0.121	-0.211	-0.067	-0.188	-0.201	-0.2	-0.2	-0.183	-0.121	-0.201	-0.183	-0.121	-0.2	-0.188
174	MATSv7	Moran autocorrelation descriptors based on atomic van der Waals volume	ChemDes	Moran autocorrelation	0.052	0.052	0.052	0.052	0.052	0.052	0.052	0.052	0.052	0.052	0.06	0.038	0.053	0.046	0	0.046	0.038	-0.247	0.053	0.038	0.06	0.052	0.052	0.052	0.052	0.038	0.046	-0.016	0.06	0.053	0.052	0.052	0.046	0.038	0.053	0.046	0.038	0.052	0.06
175	MATSv6	Moran autocorrelation descriptors based on atomic van der Waals volume	ChemDes	Moran autocorrelation	0.052	0.052	0.052	0.052	0.052	0.052	0.052	0.052	0.052	0.052	-0.025	-0.035	-0.022	0.046	0.069	0.046	-0.035	-0.211	-0.022	-0.035	-0.025	0.052	0.052	0.052	0.052	-0.035	0.046	-0.042	-0.025	-0.022	0.052	0.052	0.046	-0.035	-0.022	0.046	-0.035	0.052	-0.025
176	MATSm8	Moran autocorrelation descriptors based on atom mass	ChemDes	Moran autocorrelation	0	0	0	0	0	0	0	0	0	0	0.003	0.067	0.013	0	0	0	0.067	0.072	0.013	0.067	0.003	0	0	0	0	0.067	0	0.049	0.003	0.013	0	0	0	0.067	0.013	0	0.067	0	0.003
177	MATSp1	Moran autocorrelation descriptors based on atomic polarizability	ChemDes	Moran autocorrelation	-0.013	-0.013	-0.013	-0.013	-0.013	-0.013	-0.013	-0.013	-0.013	-0.013	-0.008	-0.009	-0.008	-0.012	-0.017	-0.011	-0.009	-0.019	-0.008	-0.009	-0.008	-0.013	-0.013	-0.013	-0.013	-0.009	-0.012	-0.006	-0.008	-0.008	-0.013	-0.013	-0.011	-0.009	-0.008	-0.011	-0.009	-0.013	-0.008
178	MATSm4	Moran autocorrelation descriptors based on atom mass	ChemDes	Moran autocorrelation	-0.015	-0.015	-0.015	-0.015	-0.015	-0.015	-0.015	-0.015	-0.015	-0.015	-0.022	-0.079	-0.021	-0.013	-0.001	-0.046	-0.079	-0.158	-0.021	-0.079	-0.022	-0.015	-0.015	-0.015	-0.015	-0.079	-0.013	-0.099	-0.022	-0.021	-0.015	-0.015	-0.046	-0.079	-0.021	-0.046	-0.079	-0.015	-0.022
179	MATSm5	Moran autocorrelation descriptors based on atom mass	ChemDes	Moran autocorrelation	-0.102	-0.102	-0.102	-0.102	-0.102	-0.102	-0.102	-0.102	-0.102	-0.102	-0.041	-0.055	-0.029	-0.066	-0.375	-0.021	-0.055	-0.197	-0.029	-0.055	-0.041	-0.102	-0.102	-0.102	-0.102	-0.055	-0.066	-0.085	-0.041	-0.029	-0.102	-0.102	-0.021	-0.055	-0.029	-0.021	-0.055	-0.102	-0.041
180	MATSm6	Moran autocorrelation descriptors based on atom mass	ChemDes	Moran autocorrelation	0.092	0.092	0.092	0.092	0.092	0.092	0.092	0.092	0.092	0.092	-0.13	0.051	-0.118	0.082	0.124	0.082	0.051	0.009	-0.118	0.051	-0.13	0.092	0.092	0.092	0.092	0.051	0.082	0.034	-0.13	-0.118	0.092	0.092	0.082	0.051	-0.118	0.082	0.051	0.092	-0.13
181	MATSm7	Moran autocorrelation descriptors based on atom mass	ChemDes	Moran autocorrelation	0.092	0.092	0.092	0.092	0.092	0.092	0.092	0.092	0.092	0.092	-0.112	0.067	-0.089	0.082	0	0.082	0.067	0.003	-0.089	0.067	-0.112	0.092	0.092	0.092	0.092	0.067	0.082	0.039	-0.112	-0.089	0.092	0.092	0.082	0.067	-0.089	0.082	0.067	0.092	-0.112
182	MATSm1	Moran autocorrelation descriptors based on atom mass	ChemDes	Moran autocorrelation	-0.176	-0.176	-0.176	-0.176	-0.176	-0.176	-0.176	-0.176	-0.176	-0.176	-0.105	-0.112	-0.097	-0.156	-0.237	-0.144	-0.112	-0.12	-0.097	-0.112	-0.105	-0.176	-0.176	-0.176	-0.176	-0.112	-0.156	-0.07	-0.105	-0.097	-0.176	-0.176	-0.144	-0.112	-0.097	-0.144	-0.112	-0.176	-0.105
183	MATSm2	Moran autocorrelation descriptors based on atom mass	ChemDes	Moran autocorrelation	-0.088	-0.088	-0.088	-0.088	-0.088	-0.088	-0.088	-0.088	-0.088	-0.088	-0.013	-0.022	-0.053	-0.129	0.1	-0.133	-0.022	0.235	-0.053	-0.022	-0.013	-0.088	-0.088	-0.088	-0.088	-0.022	-0.129	0.027	-0.013	-0.053	-0.088	-0.088	-0.133	-0.022	-0.053	-0.133	-0.022	-0.088	-0.013
184	MATSm3	Moran autocorrelation descriptors based on atom mass	ChemDes	Moran autocorrelation	-0.112	-0.112	-0.112	-0.112	-0.112	-0.112	-0.112	-0.112	-0.112	-0.112	-0.055	-0.22	-0.049	-0.093	-0.185	-0.082	-0.22	-0.236	-0.049	-0.22	-0.055	-0.112	-0.112	-0.112	-0.112	-0.22	-0.093	-0.212	-0.055	-0.049	-0.112	-0.112	-0.082	-0.22	-0.049	-0.082	-0.22	-0.112	-0.055
185	MATSe4	Moran autocorrelation descriptors based on atomic Sanderson electronegativity	ChemDes	Moran autocorrelation	-0.218	-0.218	-0.218	-0.218	-0.218	-0.218	-0.218	-0.218	-0.218	-0.218	-0.205	-0.134	-0.219	-0.23	-0.044	-0.2	-0.134	0.8	-0.219	-0.134	-0.205	-0.218	-0.218	-0.218	-0.218	-0.134	-0.23	-0.076	-0.205	-0.219	-0.218	-0.218	-0.2	-0.134	-0.219	-0.2	-0.134	-0.218	-0.205
186	MATSe5	Moran autocorrelation descriptors based on atomic Sanderson electronegativity	ChemDes	Moran autocorrelation	0.114	0.114	0.114	0.114	0.114	0.114	0.114	0.114	0.114	0.114	-0.065	-0.065	-0.051	0.094	0.217	0.082	-0.065	-0.254	-0.051	-0.065	-0.065	0.114	0.114	0.114	0.114	-0.065	0.094	-0.113	-0.065	-0.051	0.114	0.114	0.082	-0.065	-0.051	0.082	-0.065	0.114	-0.065
187	MATSe6	Moran autocorrelation descriptors based on atomic Sanderson electronegativity	ChemDes	Moran autocorrelation	0.06	0.06	0.06	0.06	0.06	0.06	0.06	0.06	0.06	0.06	-0.031	-0.036	-0.029	0.053	0.08	0.053	-0.036	-0.216	-0.029	-0.036	-0.031	0.06	0.06	0.06	0.06	-0.036	0.053	-0.045	-0.031	-0.029	0.06	0.06	0.053	-0.036	-0.029	0.053	-0.036	0.06	-0.031
188	MATSe7	Moran autocorrelation descriptors based on atomic Sanderson electronegativity	ChemDes	Moran autocorrelation	0.06	0.06	0.06	0.06	0.06	0.06	0.06	0.06	0.06	0.06	0.061	0.044	0.055	0.053	0	0.053	0.044	-0.253	0.055	0.044	0.061	0.06	0.06	0.06	0.06	0.044	0.053	-0.016	0.061	0.055	0.06	0.06	0.053	0.044	0.055	0.053	0.044	0.06	0.061
189	MATSe1	Moran autocorrelation descriptors based on atomic Sanderson electronegativity	ChemDes	Moran autocorrelation	-0.079	-0.079	-0.079	-0.079	-0.079	-0.079	-0.079	-0.079	-0.079	-0.079	-0.046	-0.05	-0.043	-0.07	-0.105	-0.064	-0.05	-0.197	-0.043	-0.05	-0.046	-0.079	-0.079	-0.079	-0.079	-0.05	-0.07	-0.03	-0.046	-0.043	-0.079	-0.079	-0.064	-0.05	-0.043	-0.064	-0.05	-0.079	-0.046
190	MATSe2	Moran autocorrelation descriptors based on atomic Sanderson electronegativity	ChemDes	Moran autocorrelation	-0.056	-0.056	-0.056	-0.056	-0.056	-0.056	-0.056	-0.056	-0.056	-0.056	-0.034	-0.043	-0.013	-0.02	-0.143	-0.041	-0.043	-0.246	-0.013	-0.043	-0.034	-0.056	-0.056	-0.056	-0.056	-0.043	-0.02	-0.022	-0.034	-0.013	-0.056	-0.056	-0.041	-0.043	-0.013	-0.041	-0.043	-0.056	-0.034
191	MATSe3	Moran autocorrelation descriptors based on atomic Sanderson electronegativity	ChemDes	Moran autocorrelation	-0.145	-0.145	-0.145	-0.145	-0.145	-0.145	-0.145	-0.145	-0.145	-0.145	-0.065	-0.06	-0.059	-0.122	-0.227	-0.111	-0.06	-0.206	-0.059	-0.06	-0.065	-0.145	-0.145	-0.145	-0.145	-0.06	-0.122	-0.006	-0.065	-0.059	-0.145	-0.145	-0.111	-0.06	-0.059	-0.111	-0.06	-0.145	-0.065
192	MATSe8	Moran autocorrelation descriptors based on atomic Sanderson electronegativity	ChemDes	Moran autocorrelation	0	0	0	0	0	0	0	0	0	0	0.061	0.044	0.054	0	0	0	0.044	0.148	0.054	0.044	0.061	0	0	0	0	0.044	0	0.032	0.061	0.054	0	0	0	0.044	0.054	0	0.044	0	0.061
193	MATSp3	Moran autocorrelation descriptors based on atomic polarizability	ChemDes	Moran autocorrelation	0.006	0.006	0.006	0.006	0.006	0.006	0.006	0.006	0.006	0.006	0.002	-0.023	0.002	0.005	0.008	0.005	-0.023	0.014	0.002	-0.023	0.002	0.006	0.006	0.006	0.006	-0.023	0.005	-0.03	0.002	0.002	0.006	0.006	0.005	-0.023	0.002	0.005	-0.023	0.006	0.002
194	MATSp7	Moran autocorrelation descriptors based on atomic polarizability	ChemDes	Moran autocorrelation	0.004	0.004	0.004	0.004	0.004	0.004	0.004	0.004	0.004	0.004	-0.025	0.003	-0.021	0.004	0	0.004	0.003	-0.072	-0.021	0.003	-0.025	0.004	0.004	0.004	0.004	0.003	0.004	0.008	-0.025	-0.021	0.004	0.004	0.004	0.003	-0.021	0.004	0.003	0.004	-0.025
195	MATSp5	Moran autocorrelation descriptors based on atomic polarizability	ChemDes	Moran autocorrelation	-0.031	-0.031	-0.031	-0.031	-0.031	-0.031	-0.031	-0.031	-0.031	-0.031	0.004	0.002	0.004	-0.024	-0.083	-0.015	0.002	-0.011	0.004	0.002	0.004	-0.031	-0.031	-0.031	-0.031	0.002	-0.024	0.005	0.004	0.004	-0.031	-0.031	-0.015	0.002	0.004	-0.015	0.002	-0.031	0.004
196	MATSp2	Moran autocorrelation descriptors based on atomic polarizability	ChemDes	Moran autocorrelation	-0.334	-0.334	-0.334	-0.334	-0.334	-0.334	-0.334	-0.334	-0.334	-0.334	-0.286	-0.318	-0.279	-0.315	-0.293	-0.312	-0.318	-0.615	-0.279	-0.318	-0.286	-0.334	-0.334	-0.334	-0.334	-0.318	-0.315	-0.253	-0.286	-0.279	-0.334	-0.334	-0.312	-0.318	-0.279	-0.312	-0.318	-0.334	-0.286
197	GATSp8	Geary autocorrelation descriptors based on atomic polarizability	ChemDes	Geary autocorrelation	0	0	0	0	0	0	0	0	0	0	0.442	0	0.371	0	0	0	0	0	0.371	0	0.442	0	0	0	0	0	0	0	0.442	0.371	0	0	0	0	0.371	0	0	0	0.442
198	GATSv3	Geary autocorrelation descriptors based on atomic van der Waals volume	ChemDes	Geary autocorrelation	1439	1439	1439	1439	1439	1439	1439	1439	1439	1439	1099	1.59	1086	1388	1613	1299	1.59	1.55	1086	1.59	1099	1439	1439	1439	1439	1.59	1388	1481	1099	1086	1439	1439	1299	1.59	1086	1299	1.59	1439	1099
199	GATSv2	Geary autocorrelation descriptors based on atomic van der Waals volume	ChemDes	Geary autocorrelation	1306	1306	1306	1306	1306	1306	1306	1306	1306	1306	1152	1.28	1.17	1276	1102	1401	1.28	1553	1.17	1.28	1152	1306	1306	1306	1306	1.28	1276	1037	1152	1.17	1306	1306	1401	1.28	1.17	1401	1.28	1306	1152
200	GATSv1	Geary autocorrelation descriptors based on atomic van der Waals volume	ChemDes	Geary autocorrelation	1275	1275	1275	1275	1275	1275	1275	1275	1275	1275	1131	1176	1142	1276	1271	1212	1176	1332	1142	1176	1131	1275	1275	1275	1275	1176	1276	1073	1131	1142	1275	1275	1212	1176	1142	1212	1176	1275	1131
201	GATSp6	Geary autocorrelation descriptors based on atomic polarizability	ChemDes	Geary autocorrelation	0	0	0	0	0	0	0	0	0	0	1405	0.129	1404	0	0	0	0.129	0.476	1404	0.129	1405	0	0	0	0	0.129	0	0.171	1405	1404	0	0	0	0.129	1404	0	0.129	0	1405
202	GATSv7	Geary autocorrelation descriptors based on atomic van der Waals volume	ChemDes	Geary autocorrelation	0	0	0	0	0	0	0	0	0	0	0.454	0	0.418	0	0	0	0	1294	0.418	0	0.454	0	0	0	0	0	0	0.468	0.454	0.418	0	0	0	0	0.418	0	0	0	0.454
203	GATSv6	Geary autocorrelation descriptors based on atomic van der Waals volume	ChemDes	Geary autocorrelation	0	0	0	0	0	0	0	0	0	0	1116	0.571	1112	0	0	0	0.571	1177	1112	0.571	1116	0	0	0	0	0.571	0	0.749	1116	1112	0	0	0	0.571	1112	0	0.571	0	1116
204	GATSv5	Geary autocorrelation descriptors based on atomic van der Waals volume	ChemDes	Geary autocorrelation	0.189	0.189	0.189	0.189	0.189	0.189	0.189	0.189	0.189	0.189	1.05	1099	0.956	0.163	0.361	0.113	1099	1625	0.956	1099	1.05	0.189	0.189	0.189	0.189	1099	0.163	1877	1.05	0.956	0.189	0.189	0.113	1099	0.956	0.113	1099	0.189	1.05
205	GATSv4	Geary autocorrelation descriptors based on atomic van der Waals volume	ChemDes	Geary autocorrelation	1562	1562	1562	1562	1562	1562	1562	1562	1562	1562	1906	1625	2.13	1755	0.653	1681	1625	0.817	2.13	1625	1906	1562	1562	1562	1562	1625	1755	1608	1906	2.13	1562	1562	1681	1625	2.13	1681	1625	1562	1906
206	GATSe2	Geary autocorrelation descriptors based on atomic Sanderson electronegativity	ChemDes	Geary autocorrelation	1252	1252	1252	1252	1252	1252	1252	1252	1252	1252	1102	1225	1107	1209	1088	1339	1225	1512	1107	1225	1102	1252	1252	1252	1252	1225	1209	0.991	1102	1107	1252	1252	1339	1225	1107	1339	1225	1252	1102
207	GATSe3	Geary autocorrelation descriptors based on atomic Sanderson electronegativity	ChemDes	Geary autocorrelation	1465	1465	1465	1465	1465	1465	1465	1465	1465	1465	1113	1574	1.1	1412	1646	1321	1574	1541	1.1	1574	1113	1465	1465	1465	1465	1574	1412	1434	1113	1.1	1465	1465	1321	1574	1.1	1321	1574	1465	1113
208	GATSv8	Geary autocorrelation descriptors based on atomic van der Waals volume	ChemDes	Geary autocorrelation	0	0	0	0	0	0	0	0	0	0	0.086	0	0.072	0	0	0	0	0	0.072	0	0.086	0	0	0	0	0	0	0	0.086	0.072	0	0	0	0	0.072	0	0	0	0.086
209	GATSe6	Geary autocorrelation descriptors based on atomic Sanderson electronegativity	ChemDes	Geary autocorrelation	0	0	0	0	0	0	0	0	0	0	1106	0.594	1102	0	0	0	0.594	1198	1102	0.594	1106	0	0	0	0	0.594	0	0.778	1106	1102	0	0	0	0.594	1102	0	0.594	0	1106
210	GATSe7	Geary autocorrelation descriptors based on atomic Sanderson electronegativity	ChemDes	Geary autocorrelation	0	0	0	0	0	0	0	0	0	0	0.418	0	0.384	0	0	0	0	1318	0.384	0	0.418	0	0	0	0	0	0	0.486	0.418	0.384	0	0	0	0	0.384	0	0	0	0.418
211	GATSe4	Geary autocorrelation descriptors based on atomic Sanderson electronegativity	ChemDes	Geary autocorrelation	1617	1617	1617	1617	1617	1617	1617	1617	1617	1617	1971	1658	2205	1.82	0.666	1733	1658	0.799	2205	1658	1971	1617	1617	1617	1617	1658	1.82	1619	1971	2205	1617	1617	1733	1658	2205	1733	1658	1617	1971
212	GATSe5	Geary autocorrelation descriptors based on atomic Sanderson electronegativity	ChemDes	Geary autocorrelation	0.153	0.153	0.153	0.153	0.153	0.153	0.153	0.153	0.153	0.153	1066	1113	0.971	0.131	0.292	0.091	1113	1625	0.971	1113	1066	0.153	0.153	0.153	0.153	1113	0.131	1907	1066	0.971	0.153	0.153	0.091	1113	0.971	0.091	1113	0.153	1066
213	GATSp5	Geary autocorrelation descriptors based on atomic polarizability	ChemDes	Geary autocorrelation	0.965	0.965	0.965	0.965	0.965	0.965	0.965	0.965	0.965	0.965	0.783	0.883	0.715	0.834	1811	0.579	0.883	1816	0.715	0.883	0.783	0.965	0.965	0.965	0.965	0.883	0.834	1357	0.783	0.715	0.965	0.965	0.579	0.883	0.715	0.579	0.883	0.965	0.783
214	GATSp4	Geary autocorrelation descriptors based on atomic polarizability	ChemDes	Geary autocorrelation	0.586	0.586	0.586	0.586	0.586	0.586	0.586	0.586	0.586	0.586	0.68	1072	0.698	0.593	0.474	0.774	1072	1586	0.698	1072	0.68	0.586	0.586	0.586	0.586	1072	0.593	1474	0.68	0.698	0.586	0.586	0.774	1072	0.698	0.774	1072	0.586	0.68
215	GATSp7	Geary autocorrelation descriptors based on atomic polarizability	ChemDes	Geary autocorrelation	0	0	0	0	0	0	0	0	0	0	1254	0	1158	0	0	0	0	0.523	1158	0	1254	0	0	0	0	0	0	0.107	1254	1158	0	0	0	0	1158	0	0	0	1254
216	GATSe1	Geary autocorrelation descriptors based on atomic Sanderson electronegativity	ChemDes	Geary autocorrelation	1277	1277	1277	1277	1277	1277	1277	1277	1277	1277	1.13	1176	1141	1277	1276	1213	1176	1337	1141	1176	1.13	1277	1277	1277	1277	1176	1277	1071	1.13	1141	1277	1277	1213	1176	1141	1213	1176	1277	1.13
217	GATSp1	Geary autocorrelation descriptors based on atomic polarizability	ChemDes	Geary autocorrelation	1.37	1.37	1.37	1.37	1.37	1.37	1.37	1.37	1.37	1.37	1231	1.28	1246	1379	1346	1.31	1.28	1311	1246	1.28	1231	1.37	1.37	1.37	1.37	1.28	1379	1178	1231	1246	1.37	1.37	1.31	1.28	1246	1.31	1.28	1.37	1231
218	GATSp3	Geary autocorrelation descriptors based on atomic polarizability	ChemDes	Geary autocorrelation	1.06	1.06	1.06	1.06	1.06	1.06	1.06	1.06	1.06	1.06	0.883	2049	0.875	1028	1171	0.961	2049	2061	0.875	2049	0.883	1.06	1.06	1.06	1.06	2049	1028	2559	0.883	0.875	1.06	1.06	0.961	2049	0.875	0.961	2049	1.06	0.883
219	GATSp2	Geary autocorrelation descriptors based on atomic polarizability	ChemDes	Geary autocorrelation	1987	1987	1987	1987	1987	1987	1987	1987	1987	1987	1774	1971	2101	2268	0.974	2296	1971	2143	2101	1971	1774	1987	1987	1987	1987	1971	2268	1612	1774	2101	1987	1987	2296	1971	2101	2296	1971	1987	1774
220	GATSe8	Geary autocorrelation descriptors based on atomic Sanderson electronegativity	ChemDes	Geary autocorrelation	0	0	0	0	0	0	0	0	0	0	0.069	0	0.058	0	0	0	0	0	0.058	0	0.069	0	0	0	0	0	0	0	0.069	0.058	0	0	0	0	0.058	0	0	0	0.069
221	GATSm2	Geary autocorrelation descriptors based on atom mass	ChemDes	Geary autocorrelation	1852	1852	1852	1852	1852	1852	1852	1852	1852	1852	1616	1796	2067	2272	0.539	2275	1796	1427	2067	1796	1616	1852	1852	1852	1852	1796	2272	1445	1616	2067	1852	1852	2275	1796	2067	2275	1796	1852	1616
222	GATSm3	Geary autocorrelation descriptors based on atom mass	ChemDes	Geary autocorrelation	1.06	1.06	1.06	1.06	1.06	1.06	1.06	1.06	1.06	1.06	0.886	2328	0.874	1018	1203	0.952	2328	2671	0.874	2328	0.886	1.06	1.06	1.06	1.06	2328	1018	2996	0.886	0.874	1.06	1.06	0.952	2328	0.874	0.952	2328	1.06	0.886
223	GATSm1	Geary autocorrelation descriptors based on atom mass	ChemDes	Geary autocorrelation	1536	1536	1536	1536	1536	1536	1536	1536	1536	1536	1349	1403	1359	1532	1551	1455	1403	1469	1359	1403	1349	1536	1536	1536	1536	1403	1532	1271	1349	1359	1536	1536	1455	1403	1359	1455	1403	1536	1349
224	GATSm6	Geary autocorrelation descriptors based on atom mass	ChemDes	Geary autocorrelation	0	0	0	0	0	0	0	0	0	0	1588	0.015	1.58	0	0	0	0.015	0.073	1.58	0.015	1588	0	0	0	0	0.015	0	0.02	1588	1.58	0	0	0	0.015	1.58	0	0.015	0	1588
225	GATSm7	Geary autocorrelation descriptors based on atom mass	ChemDes	Geary autocorrelation	0	0	0	0	0	0	0	0	0	0	1571	0	1442	0	0	0	0	0.081	1442	0	1571	0	0	0	0	0	0	0.012	1571	1442	0	0	0	0	1442	0	0	0	1571
226	GATSm4	Geary autocorrelation descriptors based on atom mass	ChemDes	Geary autocorrelation	0.369	0.369	0.369	0.369	0.369	0.369	0.369	0.369	0.369	0.369	0.386	0.995	0.344	0.318	0.487	0.587	0.995	2304	0.344	0.995	0.386	0.369	0.369	0.369	0.369	0.995	0.318	1516	0.386	0.344	0.369	0.369	0.587	0.995	0.344	0.587	0.995	0.369	0.386
227	GATSm5	Geary autocorrelation descriptors based on atom mass	ChemDes	Geary autocorrelation	1282	1282	1282	1282	1282	1282	1282	1282	1282	1282	0.765	0.886	0.696	1099	2474	0.762	0.886	2181	0.696	0.886	0.765	1282	1282	1282	1282	0.886	1099	1285	0.765	0.696	1282	1282	0.762	0.886	0.696	0.762	0.886	1282	0.765
228	GATSm8	Geary autocorrelation descriptors based on atom mass	ChemDes	Geary autocorrelation	0	0	0	0	0	0	0	0	0	0	0.574	0	0.479	0	0	0	0	0	0.479	0	0.574	0	0	0	0	0	0	0	0.574	0.479	0	0	0	0	0.479	0	0	0	0.574
229	TPSA	Topological polarity surface area	ChemDes	Molecular property	17.82	17.82	17.82	17.82	17.82	17.82	17.82	17.82	17.82	17.82	17.82	17.82	17.82	17.82	17.82	17.82	17.82	53.46	17.82	17.82	17.82	17.82	17.82	17.82	17.82	17.82	17.82	17.82	17.82	17.82	17.82	17.82	17.82	17.82	17.82	17.82	17.82	17.82	17.82
230	Hy	Hydrophilic index	ChemDes	Molecular property	-3366	-3366	-3366	-3366	-3366	-3366	-3366	-3366	-3366	-3366	-3934	-3934	-4087	-3577	-2846	-3577	-3934	-4224	-4087	-3934	-3934	-3366	-3366	-3366	-3366	-3934	-3577	-4475	-3934	-4087	-3366	-3366	-3577	-3934	-4087	-3577	-3934	-3366	-3934
231	LogP	LogP value based on the Crippen method	ChemDes	Molecular property	3642	3642	3642	3642	3642	3642	3642	3642	3642	3642	4884	5.49	5664	4422	2084	4278	3476	6.67	5664	5.49	4884	3642	3642	3642	3642	5.49	4422	6474	4884	5664	3642	3642	4278	3476	5664	4278	5.49	3642	4884
232	LogP2	Square of LogP value based on the Crippen method	ChemDes	Molecular property	13261	13261	13261	13261	13261	13261	13261	13261	13261	13261	23852	30142	32081	19552	4345	18297	12081	44482	32081	30142	23852	13261	13261	13261	13261	30142	19552	41915	23852	32081	13261	13261	18297	12081	32081	18297	30142	13261	23852
233	UI	Unsaturation index	ChemDes	Molecular property	2585	2585	2585	2585	2585	2585	2585	2585	2585	2585	2585	2585	2585	2585	2585	3459	4.17	4	2585	2585	2585	2585	2585	2585	2585	2585	2585	2585	2585	2585	2585	2585	3459	4.17	2585	3459	2585	2585	2585
234	MR	Molar refracitivity	ChemDes	Molecular property	78734	78734	78734	78734	78734	78734	78734	78734	78734	78734	99.82	102208	109054	87968	60.31	86774	100614	159758	109054	102208	99.82	78734	78734	78734	78734	102208	87968	130128	99.82	109054	78734	78734	86774	100614	109054	86774	102208	78734	99.82
235	ATSe1	Moreau-Broto autocorrelation descriptors based on Sanderson electronegativity	ChemDes	Moreau-Broto autocorrelation	2.92	2.92	2.92	2.92	2.92	2.92	2.92	2.92	2.92	2.92	3316	3279	3386	3023	2678	3.07	3279	3741	3386	3279	3316	2.92	2.92	2.92	2.92	3279	3023	3652	3316	3386	2.92	2.92	3.07	3279	3386	3.07	3279	2.92	3316
236	ATSe2	Moreau-Broto autocorrelation descriptors based on Sanderson electronegativity	ChemDes	Moreau-Broto autocorrelation	3318	3318	3318	3318	3318	3318	3318	3318	3318	3318	3729	3627	3.86	3.51	3089	3515	3627	4217	3.86	3627	3729	3318	3318	3318	3318	3627	3.51	4121	3729	3.86	3318	3318	3515	3627	3.86	3515	3627	3318	3729
237	ATSe3	Moreau-Broto autocorrelation descriptors based on Sanderson electronegativity	ChemDes	Moreau-Broto autocorrelation	3303	3303	3303	3303	3303	3303	3303	3303	3303	3303	3738	3607	3829	3.44	2954	3502	3607	4213	3829	3607	3738	3303	3303	3303	3303	3607	3.44	4069	3738	3829	3303	3303	3502	3607	3829	3502	3607	3303	3738
238	ATSe4	Moreau-Broto autocorrelation descriptors based on Sanderson electronegativity	ChemDes	Moreau-Broto autocorrelation	3356	3356	3356	3356	3356	3356	3356	3356	3356	3356	3611	3651	3842	3646	2734	3639	3651	4367	3842	3651	3611	3356	3356	3356	3356	3651	3646	3995	3611	3842	3356	3356	3639	3651	3842	3639	3651	3356	3611
239	ATSe5	Moreau-Broto autocorrelation descriptors based on Sanderson electronegativity	ChemDes	Moreau-Broto autocorrelation	3033	3033	3033	3033	3033	3033	3033	3033	3033	3033	3.49	3738	3658	3287	2169	3252	3738	4431	3658	3738	3.49	3033	3033	3033	3033	3738	3287	4177	3.49	3658	3033	3033	3252	3738	3658	3252	3738	3033	3.49
240	ATSe6	Moreau-Broto autocorrelation descriptors based on Sanderson electronegativity	ChemDes	Moreau-Broto autocorrelation	2398	2398	2398	2398	2398	2398	2398	2398	2398	2398	3152	3573	3234	2565	1946	2833	3573	4661	3234	3573	3152	2398	2398	2398	2398	3573	2565	4281	3152	3234	2398	2398	2833	3573	3234	2833	3573	2398	3152
241	ATSe7	Moreau-Broto autocorrelation descriptors based on Sanderson electronegativity	ChemDes	Moreau-Broto autocorrelation	2565	2565	2565	2565	2565	2565	2565	2565	2565	2565	3132	3296	3292	2944	0	2565	3296	4572	3292	3296	3132	2565	2565	2565	2565	3296	2944	4054	3132	3292	2565	2565	2565	3296	3292	2565	3296	2565	3132
242	ATSe8	Moreau-Broto autocorrelation descriptors based on Sanderson electronegativity	ChemDes	Moreau-Broto autocorrelation	0	0	0	0	0	0	0	0	0	0	3041	2773	3293	0	0	0	2773	4407	3293	2773	3041	0	0	0	0	2773	0	3.85	3041	3293	0	0	0	2773	3293	0	2773	0	3041
243	ATSp8	Moreau-Broto autocorrelation descriptors based on atomic polarizability	ChemDes	Moreau-Broto autocorrelation	0	0	0	0	0	0	0	0	0	0	3094	2773	3334	0	0	0	2773	4407	3334	2773	3094	0	0	0	0	2773	0	3.85	3094	3334	0	0	0	2773	3334	0	2773	0	3094
244	ATSp3	Moreau-Broto autocorrelation descriptors based on atomic polarizability	ChemDes	Moreau-Broto autocorrelation	3251	3251	3251	3251	3251	3251	3251	3251	3251	3251	3718	3.69	3811	3395	2.88	3.46	3.69	4.15	3811	3.69	3718	3251	3251	3251	3251	3.69	3395	4194	3718	3811	3251	3251	3.46	3.69	3811	3.46	3.69	3251	3718
245	ATSv8	Moreau-Broto autocorrelation descriptors based on atomic van der Waals volume	ChemDes	Moreau-Broto autocorrelation	0	0	0	0	0	0	0	0	0	0	3053	2773	3303	0	0	0	2773	4407	3303	2773	3053	0	0	0	0	2773	0	3.85	3053	3303	0	0	0	2773	3303	0	2773	0	3053
246	ATSp1	Moreau-Broto autocorrelation descriptors based on atomic polarizability	ChemDes	Moreau-Broto autocorrelation	2961	2961	2961	2961	2961	2961	2961	2961	2961	2961	3343	3307	3412	3059	2729	3105	3307	3626	3412	3307	3343	2961	2961	2961	2961	3307	3059	3672	3343	3412	2961	2961	3105	3307	3412	3105	3307	2961	3343
247	ATSp7	Moreau-Broto autocorrelation descriptors based on atomic polarizability	ChemDes	Moreau-Broto autocorrelation	2565	2565	2565	2565	2565	2565	2565	2565	2565	2565	3251	3296	3395	2944	0	2565	3296	4.35	3395	3296	3251	2565	2565	2565	2565	3296	2944	4016	3251	3395	2565	2565	2565	3296	3395	2565	3296	2565	3251
248	ATSp6	Moreau-Broto autocorrelation descriptors based on atomic polarizability	ChemDes	Moreau-Broto autocorrelation	2398	2398	2398	2398	2398	2398	2398	2398	2398	2398	3206	3512	3284	2565	1946	2833	3512	4.46	3284	3512	3206	2398	2398	2398	2398	3512	2565	4.22	3206	3284	2398	2398	2833	3512	3284	2833	3512	2398	3206
249	ATSp5	Moreau-Broto autocorrelation descriptors based on atomic polarizability	ChemDes	Moreau-Broto autocorrelation	3186	3186	3186	3186	3186	3186	3186	3186	3186	3186	3462	3718	3634	3407	2.5	3337	3718	4318	3634	3718	3462	3186	3186	3186	3186	3718	3407	4132	3462	3634	3186	3186	3337	3718	3634	3337	3718	3186	3462
250	ATSp4	Moreau-Broto autocorrelation descriptors based on atomic polarizability	ChemDes	Moreau-Broto autocorrelation	3175	3175	3175	3175	3175	3175	3175	3175	3175	3175	3.44	3585	3656	3448	2704	3493	3585	4243	3656	3585	3.44	3175	3175	3175	3175	3585	3448	3992	3.44	3656	3175	3175	3493	3585	3656	3493	3585	3175	3.44
251	ATSv1	Moreau-Broto autocorrelation descriptors based on atomic van der Waals volume	ChemDes	Moreau-Broto autocorrelation	2834	2834	2834	2834	2834	2834	2834	2834	2834	2834	3259	3.22	3333	2945	2566	2997	3.22	3583	3333	3.22	3259	2834	2834	2834	2834	3.22	2945	3611	3259	3333	2834	2834	2997	3.22	3333	2997	3.22	2834	3259
252	ATSp2	Moreau-Broto autocorrelation descriptors based on atomic polarizability	ChemDes	Moreau-Broto autocorrelation	3404	3404	3404	3404	3404	3404	3404	3404	3404	3404	3786	3691	3955	3643	2988	3633	3691	4065	3955	3691	3786	3404	3404	3404	3404	3691	3643	4.16	3786	3955	3404	3404	3633	3691	3955	3633	3691	3404	3786
253	ATSv3	Moreau-Broto autocorrelation descriptors based on atomic van der Waals volume	ChemDes	Moreau-Broto autocorrelation	3.17	3.17	3.17	3.17	3.17	3.17	3.17	3.17	3.17	3.17	3666	3542	3764	3325	2.76	3394	3542	4.05	3764	3542	3666	3.17	3.17	3.17	3.17	3542	3325	4047	3666	3764	3.17	3.17	3394	3542	3764	3394	3542	3.17	3666
254	ATSv2	Moreau-Broto autocorrelation descriptors based on atomic van der Waals volume	ChemDes	Moreau-Broto autocorrelation	3256	3256	3256	3256	3256	3256	3256	3256	3256	3256	3687	3582	3835	3475	2955	3465	3582	4039	3835	3582	3687	3256	3256	3256	3256	3582	3475	4093	3687	3835	3256	3256	3465	3582	3835	3465	3582	3256	3687
255	ATSv5	Moreau-Broto autocorrelation descriptors based on atomic van der Waals volume	ChemDes	Moreau-Broto autocorrelation	3.07	3.07	3.07	3.07	3.07	3.07	3.07	3.07	3.07	3.07	3419	3666	3598	3316	2256	3272	3666	4243	3598	3666	3419	3.07	3.07	3.07	3.07	3666	3316	4078	3419	3598	3.07	3.07	3272	3666	3598	3272	3666	3.07	3419
256	ATSv4	Moreau-Broto autocorrelation descriptors based on atomic van der Waals volume	ChemDes	Moreau-Broto autocorrelation	3171	3171	3171	3171	3171	3171	3171	3171	3171	3171	3441	3532	3663	3453	2658	3469	3532	4157	3663	3532	3441	3171	3171	3171	3171	3532	3453	3923	3441	3663	3171	3171	3469	3532	3663	3469	3532	3171	3441
257	ATSv7	Moreau-Broto autocorrelation descriptors based on atomic van der Waals volume	ChemDes	Moreau-Broto autocorrelation	2565	2565	2565	2565	2565	2565	2565	2565	2565	2565	3146	3296	3305	2944	0	2565	3296	4382	3305	3296	3146	2565	2565	2565	2565	3296	2944	4021	3146	3305	2565	2565	2565	3296	3305	2565	3296	2565	3146
258	ATSv6	Moreau-Broto autocorrelation descriptors based on atomic van der Waals volume	ChemDes	Moreau-Broto autocorrelation	2398	2398	2398	2398	2398	2398	2398	2398	2398	2398	3106	3.52	3191	2565	1946	2833	3.52	4489	3191	3.52	3106	2398	2398	2398	2398	3.52	2565	4228	3106	3191	2398	2398	2833	3.52	3191	2833	3.52	2398	3106
259	ATSm8	Moreau-Broto autocorrelation descriptors based on atom mass	ChemDes	Moreau-Broto autocorrelation	0	0	0	0	0	0	0	0	0	0	3117	2773	3353	0	0	0	2773	4407	3353	2773	3117	0	0	0	0	2773	0	3.85	3117	3353	0	0	0	2773	3353	0	2773	0	3117
260	ATSm1	Moreau-Broto autocorrelation descriptors based on atom mass	ChemDes	Moreau-Broto autocorrelation	3.16	3.16	3.16	3.16	3.16	3.16	3.16	3.16	3.16	3.16	3483	3452	3543	3241	2974	3.28	3452	3855	3543	3452	3483	3.16	3.16	3.16	3.16	3452	3241	3774	3483	3543	3.16	3.16	3.28	3452	3543	3.28	3452	3.16	3483
261	ATSm2	Moreau-Broto autocorrelation descriptors based on atom mass	ChemDes	Moreau-Broto autocorrelation	3643	3643	3643	3643	3643	3643	3643	3643	3643	3643	3955	3875	4117	3858	3253	3861	3875	4377	4117	3875	3955	3643	3643	3643	3643	3875	3858	4279	3955	4117	3643	3643	3861	3875	4117	3861	3875	3643	3955
262	ATSm3	Moreau-Broto autocorrelation descriptors based on atom mass	ChemDes	Moreau-Broto autocorrelation	3473	3473	3473	3473	3473	3473	3473	3473	3473	3473	3852	3883	3933	3.59	3188	3644	3883	4415	3933	3883	3852	3473	3473	3473	3473	3883	3.59	4342	3852	3933	3473	3473	3644	3883	3933	3644	3883	3473	3852
263	ATSm4	Moreau-Broto autocorrelation descriptors based on atom mass	ChemDes	Moreau-Broto autocorrelation	3415	3415	3415	3415	3415	3415	3415	3415	3415	3415	3657	3774	3.88	3691	2838	3725	3774	4544	3.88	3774	3657	3415	3415	3415	3415	3774	3691	4139	3657	3.88	3415	3415	3725	3774	3.88	3725	3774	3415	3657
264	ATSm5	Moreau-Broto autocorrelation descriptors based on atom mass	ChemDes	Moreau-Broto autocorrelation	3248	3248	3248	3248	3248	3248	3248	3248	3248	3248	3588	3852	3741	3457	2.62	3373	3852	4597	3741	3852	3588	3248	3248	3248	3248	3852	3457	4298	3588	3741	3248	3248	3373	3852	3741	3373	3852	3248	3588
265	ATSm6	Moreau-Broto autocorrelation descriptors based on atom mass	ChemDes	Moreau-Broto autocorrelation	2398	2398	2398	2398	2398	2398	2398	2398	2398	2398	3346	3574	3415	2565	1946	2833	3574	4663	3415	3574	3346	2398	2398	2398	2398	3574	2565	4281	3346	3415	2398	2398	2833	3574	3415	2833	3574	2398	3346
266	ATSm7	Moreau-Broto autocorrelation descriptors based on atom mass	ChemDes	Moreau-Broto autocorrelation	2565	2565	2565	2565	2565	2565	2565	2565	2565	2565	3329	3296	3463	2944	0	2565	3296	4575	3463	3296	3329	2565	2565	2565	2565	3296	2944	4055	3329	3463	2565	2565	2565	3296	3463	2565	3296	2565	3329
267	QNmin	Most negative charge on N atom	ChemDes	Charge	-0.334	-0.334	-0.334	-0.334	-0.334	-0.334	-0.334	-0.334	-0.334	-0.334	-0.334	-0.334	-0.334	-0.334	-0.334	-0.327	-0.334	-0.328	-0.334	-0.334	-0.334	-0.334	-0.334	-0.334	-0.334	-0.334	-0.334	-0.334	-0.334	-0.334	-0.334	-0.334	-0.327	-0.334	-0.334	-0.327	-0.334	-0.334	-0.334
268	Mpc	Mean of positive charges	ChemDes	Charge	0.032	0.032	0.032	0.032	0.032	0.032	0.032	0.032	0.032	0.032	0.033	0.032	0.032	0.031	0.035	0.039	0.046	0.036	0.032	0.032	0.033	0.032	0.032	0.032	0.032	0.032	0.031	0.032	0.033	0.032	0.032	0.032	0.039	0.046	0.032	0.039	0.032	0.032	0.033
269	QHss	Sum of squares of charges on H atom	ChemDes	Charge	0.028	0.028	0.028	0.028	0.028	0.028	0.028	0.028	0.028	0.028	0.035	0.036	0.036	0.029	0.023	0.033	0.058	0.056	0.036	0.036	0.035	0.028	0.028	0.028	0.028	0.036	0.029	0.044	0.035	0.036	0.028	0.028	0.033	0.058	0.036	0.033	0.036	0.028	0.035
270	SPP	Submolecular polarity parameter	ChemDes	Charge	0.465	0.465	0.465	0.465	0.465	0.465	0.465	0.465	0.465	0.465	0.465	0.466	0.466	0.466	0.464	0.46	0.474	0.475	0.466	0.466	0.465	0.465	0.465	0.465	0.465	0.466	0.466	0.466	0.465	0.466	0.465	0.465	0.46	0.474	0.466	0.46	0.466	0.465	0.465
271	LDI	Local dipole index	ChemDes	Charge	0.144	0.144	0.144	0.144	0.144	0.144	0.144	0.144	0.144	0.144	0.094	0.099	0.091	0.135	0.176	0.132	0.101	0.179	0.091	0.099	0.094	0.144	0.144	0.144	0.144	0.099	0.135	0.07	0.094	0.091	0.144	0.144	0.132	0.101	0.091	0.132	0.099	0.144	0.094
272	QCmin	Most negative charge on C atom	ChemDes	Charge	-0.058	-0.058	-0.058	-0.058	-0.058	-0.058	-0.058	-0.058	-0.058	-0.058	-0.058	-0.055	-0.056	-0.056	-0.055	-0.06	-0.062	-0.055	-0.056	-0.055	-0.058	-0.058	-0.058	-0.058	-0.058	-0.055	-0.056	-0.055	-0.058	-0.056	-0.058	-0.058	-0.06	-0.062	-0.056	-0.06	-0.055	-0.058	-0.058
273	Mac	Mean of absolute charges	ChemDes	Charge	0.047	0.047	0.047	0.047	0.047	0.047	0.047	0.047	0.047	0.047	0.045	0.044	0.043	0.044	0.053	0.051	0.058	0.055	0.043	0.044	0.045	0.047	0.047	0.047	0.047	0.044	0.044	0.042	0.045	0.043	0.047	0.047	0.051	0.058	0.043	0.051	0.044	0.047	0.045
274	Qass	Sum of squares of charges on all atoms	ChemDes	Charge	0.24	0.24	0.24	0.24	0.24	0.24	0.24	0.24	0.24	0.24	0.255	0.259	0.26	0.246	0.225	0.252	0.292	0.672	0.26	0.259	0.255	0.24	0.24	0.24	0.24	0.259	0.246	0.275	0.255	0.26	0.24	0.24	0.252	0.292	0.26	0.252	0.259	0.24	0.255
275	QNss	Sum of squares of charges on N atom	ChemDes	Charge	0.166	0.166	0.166	0.166	0.166	0.166	0.166	0.166	0.166	0.166	0.166	0.166	0.166	0.166	0.166	0.16	0.165	0.484	0.166	0.166	0.166	0.166	0.166	0.166	0.166	0.166	0.166	0.166	0.166	0.166	0.166	0.166	0.16	0.165	0.166	0.16	0.166	0.166	0.166
276	QCmax	Most positive charge on C atom	ChemDes	Charge	0.131	0.131	0.131	0.131	0.131	0.131	0.131	0.131	0.131	0.131	0.131	0.132	0.132	0.132	0.13	0.133	0.14	0.147	0.132	0.132	0.131	0.131	0.131	0.131	0.131	0.132	0.132	0.132	0.131	0.132	0.131	0.131	0.133	0.14	0.132	0.133	0.132	0.131	0.131
277	Tpc	Total of positive charges	ChemDes	Charge	1034	1034	1034	1034	1034	1034	1034	1034	1034	1034	1249	1289	1326	1111	0.849	1127	1.34	2437	1326	1289	1249	1034	1034	1034	1034	1289	1111	1542	1249	1326	1034	1034	1127	1.34	1326	1127	1289	1034	1249
278	Qmax	Most positive charge in a molecule	ChemDes	Charge	0.131	0.131	0.131	0.131	0.131	0.131	0.131	0.131	0.131	0.131	0.131	0.132	0.132	0.132	0.13	0.133	0.14	0.147	0.132	0.132	0.131	0.131	0.131	0.131	0.131	0.132	0.132	0.132	0.131	0.132	0.131	0.131	0.133	0.14	0.132	0.133	0.132	0.131	0.131
279	QOmin	Most negative charge on O atom	ChemDes	Charge	0	0	0	0	0	0	0	0	0	0	0	0	0	0	0	0	0	0	0	0	0	0	0	0	0	0	0	0	0	0	0	0	0	0	0	0	0	0	0
280	Tnc	total of negative charges	ChemDes	Charge	-1034	-1034	-1034	-1034	-1034	-1034	-1034	-1034	-1034	-1034	-1249	-1289	-1326	-1111	-0.849	-1127	-1.34	-2437	-1326	-1289	-1249	-1034	-1034	-1034	-1034	-1289	-1111	-1542	-1249	-1326	-1034	-1034	-1127	-1.34	-1326	-1127	-1289	-1034	-1249
281	QHmin	Most negative charge on H atom	ChemDes	Charge	0.024	0.024	0.024	0.024	0.024	0.024	0.024	0.024	0.024	0.024	0.024	0.024	0.024	0.024	0.024	0.024	0.024	0.024	0.024	0.024	0.024	0.024	0.024	0.024	0.024	0.024	0.024	0.024	0.024	0.024	0.024	0.024	0.024	0.024	0.024	0.024	0.024	0.024	0.024
282	QCss	Sum of squares of charges on C atom	ChemDes	Charge	0.046	0.046	0.046	0.046	0.046	0.046	0.046	0.046	0.046	0.046	0.053	0.057	0.057	0.05	0.034	0.059	0.068	0.121	0.057	0.057	0.053	0.046	0.046	0.046	0.046	0.057	0.05	0.065	0.053	0.057	0.046	0.046	0.059	0.068	0.057	0.059	0.057	0.046	0.053
283	QHmax	Most positive charge on H atom	ChemDes	Charge	0.084	0.084	0.084	0.084	0.084	0.084	0.084	0.084	0.084	0.084	0.084	0.084	0.084	0.084	0.084	0.065	0.084	0.084	0.084	0.084	0.084	0.084	0.084	0.084	0.084	0.084	0.084	0.084	0.084	0.084	0.084	0.084	0.065	0.084	0.084	0.065	0.084	0.084	0.084
284	QNmax	Most positive charge on N atom	ChemDes	Charge	-0.233	-0.233	-0.233	-0.233	-0.233	-0.233	-0.233	-0.233	-0.233	-0.233	-0.234	-0.233	-0.234	-0.233	-0.233	-0.229	-0.233	-0.232	-0.234	-0.233	-0.234	-0.233	-0.233	-0.233	-0.233	-0.233	-0.233	-0.233	-0.234	-0.234	-0.233	-0.233	-0.229	-0.233	-0.234	-0.229	-0.233	-0.233	-0.234
285	Rnc	Relative negative charge	ChemDes	Charge	0.323	0.323	0.323	0.323	0.323	0.323	0.323	0.323	0.323	0.323	0.268	0.259	0.252	0.301	0.394	0.291	0.249	0.134	0.252	0.259	0.268	0.323	0.323	0.323	0.323	0.259	0.301	0.217	0.268	0.252	0.323	0.323	0.291	0.249	0.252	0.291	0.259	0.323	0.268
286	Rpc	Relative positive charge	ChemDes	Charge	0.127	0.127	0.127	0.127	0.127	0.127	0.127	0.127	0.127	0.127	0.105	0.102	0.1	0.119	0.154	0.118	0.105	0.06	0.1	0.102	0.105	0.127	0.127	0.127	0.127	0.102	0.119	0.085	0.105	0.1	0.127	0.127	0.118	0.105	0.1	0.118	0.102	0.127	0.105
287	Qmin	Most negative charge in a molecule	ChemDes	Charge	-0.334	-0.334	-0.334	-0.334	-0.334	-0.334	-0.334	-0.334	-0.334	-0.334	-0.334	-0.334	-0.334	-0.334	-0.334	-0.327	-0.334	-0.328	-0.334	-0.334	-0.334	-0.334	-0.334	-0.334	-0.334	-0.334	-0.334	-0.334	-0.334	-0.334	-0.334	-0.334	-0.327	-0.334	-0.334	-0.327	-0.334	-0.334	-0.334
288	Tac	Total of absolute charges	ChemDes	Charge	2068	2068	2068	2068	2068	2068	2068	2068	2068	2068	2498	2579	2653	2223	1697	2254	2.68	4875	2653	2579	2498	2068	2068	2068	2068	2579	2223	3084	2498	2653	2068	2068	2254	2.68	2653	2254	2579	2068	2498
289	Mnc	Mean of negative charges	ChemDes	Charge	-0.086	-0.086	-0.086	-0.086	-0.086	-0.086	-0.086	-0.086	-0.086	-0.086	-0.069	-0.072	-0.066	-0.079	-0.106	-0.075	-0.079	-0.116	-0.066	-0.072	-0.069	-0.086	-0.086	-0.086	-0.086	-0.072	-0.079	-0.059	-0.069	-0.066	-0.086	-0.086	-0.075	-0.079	-0.066	-0.075	-0.072	-0.086	-0.069
290	EstateVSA4	MOE-type descriptors using Estate indices and surface area contributions	ChemDes	MOE-type	11259	11259	11259	11259	11259	11259	11259	11259	11259	11259	36943	75468	36943	11259	11259	11082	10609	0	36943	75468	36943	11259	11259	11259	11259	75468	11259	5694	36943	36943	11259	11259	11082	10609	36943	11082	75468	11259	36943
291	EstateVSA7	MOE-type descriptors using Estate indices and surface area contributions	ChemDes	MOE-type	66278	66278	66278	66278	66278	66278	66278	66278	66278	66278	45507	38583	59354	80125	56896	77423	99246	136148	59354	38583	45507	66278	66278	66278	66278	38583	80125	38583	45507	59354	66278	66278	77423	99246	59354	77423	38583	66278	45507
292	EstateVSA1	MOE-type descriptors using Estate indices and surface area contributions	ChemDes	MOE-type	13337	13337	13337	13337	13337	13337	13337	13337	13337	13337	7922	13337	18234	23649	13337	18234	5415	34.37	18234	13337	7922	13337	13337	13337	13337	13337	23649	13337	7922	18234	13337	13337	18234	5415	18234	18234	13337	13337	7922
293	EstateVSA3	MOE-type descriptors using Estate indices and surface area contributions	ChemDes	MOE-type	0	0	0	0	0	0	0	0	0	0	40908	11318	29.59	0	0	5517	11259	33778	29.59	11318	40908	0	0	0	0	11318	0	58661	40908	29.59	0	0	5517	11259	29.59	5517	11318	0	40908
294	VSAEstate7	MOE-type descriptors using surface area contributions and Estate indices	ChemDes	MOE-type	2242	2242	2242	2242	2242	2242	2242	2242	2242	2242	2375	2398	2386	2253	2159	2289	2201	7121	2386	2398	2375	2242	2242	2242	2242	2398	2253	2.53	2375	2386	2242	2242	2289	2201	2386	2289	2398	2242	2375
295	VSAEstate8	MOE-type descriptors using surface area contributions and Estate indices	ChemDes	MOE-type	29082	29082	29082	29082	29082	29082	29082	29082	29082	29082	35865	35926	39688	32905	22498	33285	41.79	62704	39688	35926	35865	29082	29082	29082	29082	35926	32905	46461	35865	39688	29082	29082	33285	41.79	39688	33285	35926	29082	35865
296	LabuteASA	Labute's Approximate Surface Area	ChemDes	MOE-type	107584	107584	107584	107584	107584	107584	107584	107584	107584	107584	142756	143762	155486	120314	82124	117536	139509	226625	155486	143762	142756	107584	107584	107584	107584	143762	120314	190658	142756	155486	107584	107584	117536	139509	155486	117536	143762	107584	142756
297	PEOEVSA0	MOE-type descriptors using partial charges and surface area contributions	ChemDes	MOE-type	4567	4567	4567	4567	4567	4567	4567	4567	4567	4567	4567	4567	4567	4567	4567	4567	4567	13701	4567	4567	4567	4567	4567	4567	4567	4567	4567	4567	4567	4567	4567	4567	4567	4567	4567	4567	4567	4567	4567
298	PEOEVSA7	MOE-type descriptors using partial charges and surface area contributions	ChemDes	MOE-type	18.66	18.66	18.66	18.66	18.66	18.66	18.66	18.66	18.66	18.66	19162	18.66	19162	18.66	18.66	7048	26581	52961	19162	18.66	19162	18.66	18.66	18.66	18.66	18.66	18.66	18.66	19162	19162	18.66	18.66	7048	26581	19162	7048	18.66	18.66	19162
299	PEOEVSA6	MOE-type descriptors using partial charges and surface area contributions	ChemDes	MOE-type	19.24	19.24	19.24	19.24	19.24	19.24	19.24	19.24	19.24	19.24	75015	44923	74009	18234	21251	30366	10609	41542	74009	44923	75015	19.24	19.24	19.24	19.24	44923	18234	130791	75015	74009	19.24	19.24	30366	10609	74009	30366	44923	19.24	75015
300	PEOEVSA5	MOE-type descriptors using partial charges and surface area contributions	ChemDes	MOE-type	48466	48466	48466	48466	48466	48466	48466	48466	48466	48466	27695	59296	41542	62314	20771	53675	81435	62314	41542	59296	27695	48466	48466	48466	48466	59296	62314	20771	27695	41542	48466	48466	53675	81435	41542	53675	59296	48466	27695
301	MRVSA4	MOE-type descriptors using MR contributions and surface area contributions	ChemDes	MOE-type	65199	65199	65199	65199	65199	65199	65199	65199	65199	65199	77035	101712	89877	78041	26186	51855	26186	138227	89877	101712	77035	65199	65199	65199	65199	101712	78041	101712	77035	89877	65199	65199	51855	26186	89877	51855	101712	65199	77035
302	MRVSA6	MOE-type descriptors using MR contributions and surface area contributions	ChemDes	MOE-type	11891	11891	11891	11891	11891	11891	11891	11891	11891	11891	11891	11891	11891	11891	11891	24265	72554	35672	11891	11891	11891	11891	11891	11891	11891	11891	11891	11891	11891	11891	11891	11891	24265	72554	11891	24265	11891	11891	11891
303	slogPVSA2	MOE-type descriptors using SLogP contributions and surface area contributions	ChemDes	MOE-type	12463	12463	12463	12463	12463	12463	12463	12463	12463	12463	7048	12463	7048	12463	12463	7048	12463	16245	7048	12463	7048	12463	12463	12463	12463	12463	12463	12463	7048	7048	12463	12463	7048	12463	7048	7048	12463	12463	7048
304	slogPVSA3	MOE-type descriptors using SLogP contributions and surface area contributions	ChemDes	MOE-type	0	0	0	0	0	0	0	0	0	0	23672	0	23672	0	0	0	0	0	23672	0	23672	0	0	0	0	0	0	47343	23672	23672	0	0	0	0	23672	0	0	0	23672
305	slogPVSA0	MOE-type descriptors using SLogP contributions and surface area contributions	ChemDes	MOE-type	5565	5565	5565	5565	5565	5565	5565	5565	5565	5565	5565	5565	5565	5565	5565	5565	16175	16696	5565	5565	5565	5565	5565	5565	5565	5565	5565	5565	5565	5565	5565	5565	5565	16175	5565	5565	5565	5565	5565
306	slogPVSA1	MOE-type descriptors using SLogP contributions and surface area contributions	ChemDes	MOE-type	20869	20869	20869	20869	20869	20869	20869	20869	20869	20869	20869	20869	19863	19863	22881	19863	9551	28653	19863	20869	20869	20869	20869	20869	20869	20869	19863	20869	20869	19863	20869	20869	19863	9551	19863	19863	20869	20869	20869
307	slogPVSA4	MOE-type descriptors using SLogP contributions and surface area contributions	ChemDes	MOE-type	54.16	54.16	54.16	54.16	54.16	54.16	54.16	54.16	54.16	54.16	71411	90673	85258	68008	26465	41542	26465	139063	85258	90673	71411	54.16	54.16	54.16	54.16	90673	68008	90673	71411	85258	54.16	54.16	41542	26465	85258	41542	90673	54.16	71411
308	slogPVSA5	MOE-type descriptors using SLogP contributions and surface area contributions	ChemDes	MOE-type	6197	6197	6197	6197	6197	6197	6197	6197	6197	6197	6197	6197	6197	6197	6197	24265	66861	18591	6197	6197	6197	6197	6197	6197	6197	6197	6197	6197	6197	6197	6197	6197	24265	66861	6197	24265	6197	6197	6197

## Sheet: Blad3
unit	description	calculation
-	basicity' of the basic nitrogen of the phosphine ligand, T dependent	Calculated using ChemAxon with the program MarvinSketch. It calculated for different temperatures.
-	Number of C atoms in R1	Count
-	Number of H atoms in R1	Count
g/mol	Molecular weight of R1	Calculate molecular weight, including N atoms if present
-	Number of C atoms in R2	Count
-	Number of H atoms in R2	Count
g/mol	Molecular weight of R2	Calculate molecular weight
Å	Distance Ru-P	Measured in Spartan
Å	Distance Ru-N	Measured in Spartan
Å	Sum distance Ru-P and Ru-N	Calculated
Å	Distance P-C(imidazole)	Measured in Spartan
Å	Distance Ru-N(nitrile)	Measured in Spartan, if 2 nitriles are present, the average is taken
Å	Distance Ru-Cp(centroid)	Measured in Spartan
°	Angle P-Ru-N	Measured in Spartan
°	Angle C(imidazole)-P-Ru	Measured in Spartan
°	Angle Ru-N-C(imidazole)	Measured in Spartan
°	Angle P-C(imidazole)-N	Measured in Spartan
amu	Weight	Calculated molecular properties in Spartan
eV	E(HOMO)	Calculated molecular properties in Spartan
eV	E(LUMO)	Calculated molecular properties in Spartan
eV	E(GAP)	abs(E(HOMO)-E(LUMO))
debye	Dipole moment	Calculated molecular properties in Spartan
Å2	Area	Calculated QSAR in Spartan
Å3	Volume	Calculated QSAR in Spartan
Å3	PSA	Calculated QSAR in Spartan
-	Ovality	Calculated QSAR in Spartan
-	Polarizability	Calculated QSAR in Spartan
	Charge, electrostatic, Ru	Calculated molecular properties in Spartan
	Charge, Mulliken, Ru	Calculated molecular properties in Spartan
	Charge, electrostatic, P	Calculated molecular properties in Spartan
	Charge, Mulliken, P	Calculated molecular properties in Spartan
	Charge, electrostatic, C(imidazole)	Calculated molecular properties in Spartan
	Charge, Mulliken, C(imidazole)	Calculated molecular properties in Spartan
	Charge, electrostatic, N	Calculated molecular properties in Spartan
	Charge, Mulliken, N	Calculated molecular properties in Spartan
	Charge, electrostatic, C	Calculated molecular properties in Spartan
	Charge, Mulliken, C	Calculated molecular properties in Spartan
	Charge, electrostatic, C2	Calculated molecular properties in Spartan
	Charge, Mulliken, C2	Calculated molecular properties in Spartan
	Charge, electrostatic, N2	Calculated molecular properties in Spartan
	Charge, Mulliken, N2	Calculated molecular properties in Spartan
nsb
ncarb
naro
nhev
nta
nring
nrot
Weight
PC2
PC3
PC1
PC6
PC4
PC5
AWeight
nhyd
GMTIV
AW
Geto
DZ
Gravto
IDET
Sitov
IDE
TIAC
Arto
Qindex
petitjeant
Hatov
diametert
BertzCT
IVDE
ISIZ
Platt
ZM2
Getov
ZM1
J
radiust
Tsch
Thara
W
MZM2
GMTI
MZM1
Ipc
Sito
Tigdi
Pol
Hato
Xu
knotp
dchi3
dchi2
dchi1
dchi0
Chi5ch
Chiv4
Chiv7
Chiv6
Chiv1
Chiv0
Chiv3
Chiv2
Chi4c
dchi4
Chiv4pc
Chiv3c
Chiv8
Chi3c
Chi8
Chi9
Chi2
Chi3
Chi0
Chi1
Chi6
Chi7
Chi4
Chi5
Chiv5
Chiv4c
Chiv9
Chi4pc
knotpv
Chiv5ch
Chiv10
Chiv6ch
Chi10
mChi1
Chi6ch
kappa1
kappa3
kappa2
kappam1
kappam3
kappam2
Smax31
S32
Smax8
Smax6
Smax28
S45
Smax44
S9
S7
S19
Smin44
S13
S12
S17
Smin16
Smin31
Smax12
Smax11
Smax16
Smax18
Smin28
Smin6
S29
Smin11
Smin12
Smin18
MATSv8
MATSp4
MATSp8
MATSv1
MATSp6
MATSv3
MATSv2
MATSv5
MATSv4
MATSv7
MATSv6
MATSm8
MATSp1
MATSm4
MATSm5
MATSm6
MATSm7
MATSm1
MATSm2
MATSm3
MATSe4
MATSe5
MATSe6
MATSe7
MATSe1
MATSe2
MATSe3
MATSe8
MATSp3
MATSp7
MATSp5
MATSp2
GATSp8
GATSv3
GATSv2
GATSv1
GATSp6
GATSv7
GATSv6
GATSv5
GATSv4
GATSe2
GATSe3
GATSv8
GATSe6
GATSe7
GATSe4
GATSe5
GATSp5
GATSp4
GATSp7
GATSe1
GATSp1
GATSp3
GATSp2
GATSe8
GATSm2
GATSm3
GATSm1
GATSm6
GATSm7
GATSm4
GATSm5
GATSm8
TPSA
Hy
LogP
LogP2
UI
MR
ATSe1
ATSe2
ATSe3
ATSe4
ATSe5
ATSe6
ATSe7
ATSe8
ATSp8
ATSp3
ATSv8
ATSp1
ATSp7
ATSp6
ATSp5
ATSp4
ATSv1
ATSp2
ATSv3
ATSv2
ATSv5
ATSv4
ATSv7
ATSv6
ATSm8
ATSm1
ATSm2
ATSm3
ATSm4
ATSm5
ATSm6
ATSm7
QNmin
Mpc
QHss
SPP
LDI
QCmin
Mac
Qass
QNss
QCmax
Tpc
Qmax
QOmin
Tnc
QHmin
QCss
QHmax
QNmax
Rnc
Rpc
Qmin
Tac
Mnc
EstateVSA4
EstateVSA7
EstateVSA1
EstateVSA3
VSAEstate7
VSAEstate8
LabuteASA
PEOEVSA0
PEOEVSA7
PEOEVSA6
PEOEVSA5
MRVSA4
MRVSA6
slogPVSA2
slogPVSA3
slogPVSA0
slogPVSA1
slogPVSA4
slogPVSA5
